# Supplementary material for: Cross coupling of benzylammonium salts with boronic acids using a well-defined N-heterocyclic carbene–palladium(ii) precatalyst
Source: Royal Society of Chemistry journal article supplement (doi:10.1039/c8ra10439e), 2019-01-01

## Supporting Information

### Cross Coupling of Benzylammonium Salts with Boronic Acids Using a Well-Defined *N*-Heterocyclic Carbene Palladium(II) Precatalyst

Tao Wang\*, Jiarui Guo, Xiaojuan Wang, Han Guo, Dingli Jia, Hengjin Wang, Lantao Liu\*

*Henan Engineering Laboratory of Green Synthesis for Pharmaceuticals, School of  
Chemistry and Chemical Engineering, Shangqiu Normal University,  
Shangqiu, Henan, 476000, People's Republic of China*

*Henan Key Laboratory of Biomolecular Recognition and Sensing, School of Chemistry and  
Chemical Engineering, Shangqiu Normal University,  
Shangqiu, Henan, 476000, People's Republic of China*

|                                                                                                    |      |
|----------------------------------------------------------------------------------------------------|------|
| Characterization Data of the Catalysis Products <b>3aa-3am</b> and <b>3ba-3bi</b> .....            | S-2  |
| Copies of the <sup>1</sup> H NMR and <sup>13</sup> C NMR Spectra of Complexes <b>3aa-3am</b> ..... | S-5  |
| Copies of the <sup>1</sup> H NMR and <sup>13</sup> C NMR Spectra of Complexes <b>3ba-3bi</b> ..... | S-13 |
| Copies of the GC-MS Spectra of New Catalytic Products .....                                        | S-28 |

---

\*Tel./Fax: +86 0370-2595126; e-mail: wt67751726@126.com or liult05@iccas.ac.cn .

## Characterization Data of the Catalysis Products 3aa-3am and 3ba-3bi

**Complex (3aa)**<sup>[1, 2, 4]</sup>: <sup>1</sup>H NMR (400 MHz, CDCl<sub>3</sub>): δ 7.18 (t, *J* = 7.5 Hz, 2H, ArH), 7.09 (t, *J* = 7.8 Hz, 3H, ArH), 7.01 (d, *J* = 8.5 Hz, 2H, ArH), 6.73(d, *J* = 8.5 Hz, 2H, ArH), 3.83(s, 2H, CH<sub>2</sub>), 3.67(s, 3H, OMe). <sup>13</sup>C NMR (100 MHz, CDCl<sub>3</sub>): δ 158.0, 141.6, 133.3, 129.9, 128.9, 128.5, 126.0, 113.9, 55.3, 41.1.

**Complex (3ab)**<sup>[2, 4]</sup>: <sup>1</sup>H NMR (400 MHz, CDCl<sub>3</sub>): δ 7.30-7.26 (m, 2H, ArH), 7.22-7.18 (m, 4H, ArH), 6.79-6.73 (m, 3H, ArH), 3.96 (s, 2H, CH<sub>2</sub>), 3.76 (s, 3H, OMe). <sup>13</sup>C NMR (100 MHz, CDCl<sub>3</sub>): δ 159.7, 142.7, 140.9, 129.4, 128.9, 128.5, 126.1, 121.4, 114.8, 111.3, 55.2, 42.0.

**Complex (3ac)**<sup>[2, 4]</sup>: <sup>1</sup>H NMR (400 MHz, CDCl<sub>3</sub>): δ 7.26-7.13 (m, 6H, ArH), 7.04 (d, *J* = 6.4 Hz, 1H, ArH), 6.85 (t, *J* = 7.3 Hz, 2H, ArH), 3.95 (s, 2H, CH<sub>2</sub>), 3.79 (s, 3H, OMe). <sup>13</sup>C NMR (100 MHz, CDCl<sub>3</sub>): δ 157.4, 141.0, 130.3, 129.7, 129.0, 128.3, 127.4, 125.8, 120.5, 110.4, 55.4, 35.9.

**Complex (3ad)**: <sup>1</sup>H NMR (400 MHz, CDCl<sub>3</sub>): δ 7.28-7.25 (m, 2H, ArH), 7.20-7.16 (m, 3H, ArH), 6.34 (d, *J* = 2.2 Hz, 2H, ArH), 6.30 (t, *J* = 2.2 Hz, 1H, ArH), 3.90 (s, 2H, CH<sub>2</sub>), 3.72 (s, 6H, OMe). <sup>13</sup>C NMR (100 MHz, CDCl<sub>3</sub>): δ 160.9, 143.5, 140.8, 128.9, 128.5, 126.2, 107.2, 98.0, 55.3, 42.2. GC-MS (EI) calcd for C<sub>15</sub>H<sub>16</sub>O<sub>2</sub>: 228.1, found: 228.2.

**Complex (3ae)**<sup>[2-4]</sup>: <sup>1</sup>H NMR (400 MHz, CDCl<sub>3</sub>): δ 7.28-7.24 (m, 2H, ArH), 7.20-7.16 (m, 3H, ArH), 7.10-7.05 (m, 4H, ArH), 3.93 (s, 2H, CH<sub>2</sub>), 2.30 (s, 3H, CH<sub>3</sub>). <sup>13</sup>C NMR (100 MHz, CDCl<sub>3</sub>): δ 141.5, 138.1, 135.6, 129.2, 128.9, 128.8, 128.5, 126.0, 41.6, 21.1.

**Complex (3af)**<sup>[3]</sup>: <sup>1</sup>H NMR (400 MHz, CDCl<sub>3</sub>): δ 7.30-7.26 (m, 2H, ArH), 7.22-7.15 (m, 4H, ArH), 7.01-6.98 (m, 3H, ArH), 3.94 (s, 2H, CH<sub>2</sub>), 2.30 (s, 3H, CH<sub>3</sub>). <sup>13</sup>C NMR (100 MHz, CDCl<sub>3</sub>): δ 141.3, 141.1, 138.1, 129.7, 128.9, 128.5, 128.4, 126.8, 126.0, 125.9, 41.9, 21.4.

**Complex (3ag)**<sup>[1, 3, 4]</sup>: <sup>1</sup>H NMR (400 MHz, CDCl<sub>3</sub>): δ 7.28-7.23 (m, 3H, ArH), 7.20-7.09 (m, 6H, ArH), 3.98 (s, 2H, CH<sub>2</sub>), 2.24 (s, 3H, CH<sub>3</sub>). <sup>13</sup>C NMR (100 MHz, CDCl<sub>3</sub>): δ 140.4, 138.9, 136.7, 130.3, 130.0, 128.8, 128.4, 126.5, 126.0, 125.9, 39.5, 19.7.

**Complex (3ah)**<sup>[4]</sup>: <sup>1</sup>H NMR (400 MHz, CDCl<sub>3</sub>): δ 7.28-7.25 (m 1H, ArH), 7.19-7.16 (m, 4H, ArH), 6.81 (d, *J* = 9.1 Hz, 3H, ArH), 3.89 (s, 2H, CH<sub>2</sub>), 2.26 (s, 6H, CH<sub>3</sub>). <sup>13</sup>C NMR

(100 MHz, CDCl<sub>3</sub>):  $\delta$  141.4, 141.0, 138.0, 129.0, 128.5, 127.8, 126.8, 126.0, 41.9, 21.3.

**Complex (3ai)**<sup>[2-4]</sup>: <sup>1</sup>H NMR (400 MHz, CDCl<sub>3</sub>):  $\delta$  7.30-7.27 (m, 2H, ArH), 7.23-7.20 (m, 1H, ArH), 7.17-7.11 (m, 4H, ArH), 6.99-6.93 (m, 2H, ArH), 3.94 (s, 2H, CH<sub>2</sub>). <sup>13</sup>C NMR (100 MHz, CDCl<sub>3</sub>):  $\delta$  162.7, 160.2, 141.0, 136.8 (d,  $J = 3.0$  Hz), 130.3 (d,  $J = 7.9$  Hz), 128.7 (d,  $J = 29.2$  Hz), 126.2, 115.3 (d,  $J = 21.0$  Hz), 41.1.

**Complex (3aj)**<sup>[2-4]</sup>: <sup>1</sup>H NMR (400 MHz, CDCl<sub>3</sub>):  $\delta$  7.73-7.67 (m, 1H, ArH), 7.52 (d,  $J = 8.1$  Hz, 2H, ArH), 7.31-7.27 (m, 3H, ArH), 7.24-7.20 (m, 1H, ArH), 7.17-7.16 (m, 2H, ArH), 4.02 (s, 2H, CH<sub>2</sub>). <sup>13</sup>C NMR (100 MHz, CDCl<sub>3</sub>):  $\delta$  145.3, 140.0, 129.2, 129.0, 128.7, 127.0 (q,  $J = 263.2$  Hz), 126.5, 126.0 (q,  $J = 3.7$  Hz), 125.4 (q,  $J = 3.7$  Hz), 41.7.

**Complex (3ak)**<sup>[3-4]</sup>: <sup>1</sup>H NMR (400 MHz, CDCl<sub>3</sub>):  $\delta$  7.99-7.96 (m, 1H, ArH), 7.85-7.83 (m, 1H, ArH), 7.74 (d,  $J = 8.2$  Hz, 1H, ArH), 7.44-7.38 (m, 3H, ArH), 7.28-7.23 (m, 3H, ArH), 7.19-7.15 (m, 3H, ArH), 4.43 (s, 2H, CH<sub>2</sub>). <sup>13</sup>C NMR (100 MHz, CDCl<sub>3</sub>):  $\delta$  141.0, 138.6, 133.6, 132.1, 129.0, 128.5, 128.1, 127.7, 127.6, 127.5, 127.1, 126.2, 126.0, 125.4, 42.1.

**Complex (3al)**<sup>[1-2]</sup>: <sup>1</sup>H NMR (400 MHz, CDCl<sub>3</sub>):  $\delta$  7.80-7.34 (m, 3H, ArH), 7.62 (s, 1H, ArH), 7.46-7.39 (m, 2H, ArH), 7.32-7.27 (m, 3H, ArH), 7.23-7.18 (m, 3H, ArH), 4.13 (s, 2H, CH<sub>2</sub>). <sup>13</sup>C NMR (100 MHz, CDCl<sub>3</sub>):  $\delta$  141.0, 138.6, 133.6, 132.1, 129.1, 128.5, 128.1, 127.7, 127.6, 127.5, 127.1, 126.1, 126.0, 125.4, 42.1.

**Complex (3am)**: <sup>1</sup>H NMR (400 MHz, CDCl<sub>3</sub>):  $\delta$  7.36-7.29 (m, 2H, ArH), 7.24-7.18 (m, 4H, ArH), 6.91-6.89 (m, 2H, ArH), 3.97 (s, 2H, CH<sub>2</sub>). <sup>13</sup>C NMR (100 MHz, CDCl<sub>3</sub>):  $\delta$  141.5, 140.6, 128.8, 128.5, 126.2, 125.6, 121.3, 119.8, 36.6. GC-MS (EI) calcd for C<sub>11</sub>H<sub>10</sub>S: 174.1, found: 174.1.

**Complex (3ba)**<sup>[1]</sup>: <sup>1</sup>H NMR (400 MHz, CDCl<sub>3</sub>):  $\delta$  7.10-7.04 (m, 6H, ArH), 6.83-6.79 (m, 2H, ArH), 3.87 (s, 2H, CH<sub>2</sub>), 3.76 (s, 3H, OMe), 2.30 (s, 3H, CH<sub>3</sub>). <sup>13</sup>C NMR (100 MHz, CDCl<sub>3</sub>):  $\delta$  157.9, 138.6, 135.5, 133.6, 129.8, 129.2, 128.7, 113.9, 55.3, 40.6, 21.0.

**Complex (3bb)**: <sup>1</sup>H NMR (400 MHz, CDCl<sub>3</sub>):  $\delta$  7.16 (t,  $J = 7.8$  Hz, ArH), 7.10 (d,  $J = 8.6$  Hz, 2H, ArH), 6.98 (t,  $J = 8.8$  Hz, 3H, ArH), 6.84-6.80 (m, 2H, ArH), 3.87 (s, 2H, CH<sub>2</sub>), 3.76 (s, 3H, OMe), 2.30 (s, 3H, CH<sub>3</sub>). <sup>13</sup>C NMR (100 MHz, CDCl<sub>3</sub>):  $\delta$  158.0, 141.5, 138.0, 133.4, 129.9, 129.6, 128.4, 126.8, 125.9, 113.9, 55.3, 41.0, 21.5. GC-MS (EI) calcd for C<sub>15</sub>H<sub>16</sub>O: 212.1, found: 212.1.

**Complex (3bc)**<sup>[1]</sup>: <sup>1</sup>H NMR (400 MHz, CDCl<sub>3</sub>):  $\delta$  7.15-7.12 (m, 3H, ArH), 7.09-7.06 (m,

1H, ArH), 7.05-7.01 (m, 2H, ArH), 6.82-6.79 (m, 2H, ArH), 3.91 (s, 2H, CH<sub>2</sub>), 3.76 (s, 3H, OMe), 2.23 (s, 3H, CH<sub>3</sub>). <sup>13</sup>C NMR (100 MHz, CDCl<sub>3</sub>): δ 156.8, 138.3, 135.5, 131.4, 129.2, 128.7, 128.6, 125.3, 124.9, 112.7, 54.2, 37.5, 18.6.

**Complex (3bd):** <sup>1</sup>H NMR (400 MHz, CDCl<sub>3</sub>): δ 7.31-7.28 (m, 2H, ArH), 7.12-7.09 (m, 4H, ArH), 6.84-6.81 (m, 2H, ArH), 3.89 (s, 2H, CH<sub>2</sub>), 3.77 (s, 3H, OMe), 1.29 (s, 9H, CH<sub>3</sub>). <sup>13</sup>C NMR (100 MHz, CDCl<sub>3</sub>): δ 157.9, 148.8, 138.6, 133.5, 129.9, 128.4, 125.4, 113.9, 55.3, 40.5, 34.4, 31.4. GC-MS (EI) calcd for C<sub>18</sub>H<sub>22</sub>O: 254.2, found: 254.2.

**Complex (3be):** <sup>1</sup>H NMR (400 MHz, CDCl<sub>3</sub>): δ 7.13-7.06 (m, 4H, ArH), 6.95 (t, *J* = 8.7 Hz, 2H, ArH), 6.83 (d, *J* = 8.6 Hz, 2H, ArH), 3.88 (s, 2H, CH<sub>2</sub>), 3.77 (s, 3H, OMe). <sup>13</sup>C NMR (100 MHz, CDCl<sub>3</sub>): δ 161.4 (d, *J* = 242.2 Hz), 158.1, 137.3 (d, *J* = 30.8 Hz), 133.1, 130.2 (d, *J* = 78.9 Hz), 129.8, 115.2 (d, *J* = 210.8 Hz), 114.0, 55.3, 40.2. GC-MS (EI) calcd for C<sub>14</sub>H<sub>13</sub>FO: 216.1, found: 216.1.

**Complex (3bf):** <sup>1</sup>H NMR (400 MHz, CDCl<sub>3</sub>): δ 8.13 (d, *J* = 8.8 Hz, 2H, ArH), 7.32 (d, *J* = 8.8 Hz, 2H, ArH), 7.09 (d, *J* = 8.7 Hz, 2H, ArH), 6.86 (d, *J* = 8.7 Hz, 2H, ArH), 4.02 (s, 2H, CH<sub>2</sub>), 3.79 (s, 3H, OMe). <sup>13</sup>C NMR (100 MHz, CDCl<sub>3</sub>): δ 158.4, 149.4, 146.5, 131.3, 130.0, 129.5, 123.8, 114.2, 55.3, 40.9. GC-MS (EI) calcd for C<sub>14</sub>H<sub>13</sub>NO<sub>3</sub>: 243.1, found: 243.1.

**Complex (3bg):** <sup>1</sup>H NMR (400 MHz, CDCl<sub>3</sub>): δ 8.00-7.98 (m, 1H, ArH), 7.85-7.83 (m, 1H, ArH), 7.74 (d, *J* = 8.2 Hz, 1H, ArH), 7.45-7.38 (m, 3H, ArH), 7.26 (d, *J* = 6.9 Hz, 1H, ArH), 7.10 (d, *J* = 8.7 Hz, 2H, ArH), 6.82-6.78 (m, 2H, ArH), 4.38 (s, 2H, CH<sub>2</sub>), 3.75 (s, 3H, OMe). <sup>13</sup>C NMR (100 MHz, CDCl<sub>3</sub>): δ 157.9, 137.1, 134.0, 132.7, 132.1, 129.7, 128.7, 127.2, 127.1, 126.0, 125.6, 125.5, 124.3, 113.9, 55.3, 38.2. GC-MS (EI) calcd for C<sub>18</sub>H<sub>16</sub>O: 248.1, found: 248.2.

**Complex (3bh)**<sup>[1]</sup>: <sup>1</sup>H NMR (400 MHz, CDCl<sub>3</sub>): δ 7.79-7.73 (m, 3H, ArH), 7.60 (s, 1H, ArH), 7.45-7.38 (m, 2H, ArH), 7.30-7.28 (m, 1H, ArH), 7.13 (d, *J* = 8.7 Hz, 2H, ArH), 6.85-6.81 (m, 2H, ArH), 4.07 (s, 2H, CH<sub>2</sub>), 3.76 (s, 3H, OMe). <sup>13</sup>C NMR (100 MHz, CDCl<sub>3</sub>): δ 158.1, 139.1, 133.7, 133.1, 132.1, 130.0, 128.1, 127.7, 127.6, 127.5, 127.0, 126.0, 125.3, 114.0, 55.3, 41.3.

**Complex (3bi)**<sup>[1, 2, 4]</sup>: <sup>1</sup>H NMR (400 MHz, CDCl<sub>3</sub>): δ 7.29-7.25 (m, 2H, ArH), 7.20-7.16 (m, 3H, ArH), 7.09 (d, *J* = 8.6 Hz, 2H, ArH), 6.84-6.80 (m, 2H, ArH), 3.92 (s, 2H, CH<sub>2</sub>), 3.76 (s, 3H, OMe). <sup>13</sup>C NMR (100 MHz, CDCl<sub>3</sub>): δ 158.0, 141.6, 133.3, 129.9, 128.9, 128.5,

126.0, 113.9, 55.3, 41.1.

## References

- [1]. P. L. Türtcher , H. J. Davis , R. J. Phipps, *Synthesis*, **2018**, *50*, 793.
- [2]. P. Maity, D. M. Shacklady-McAtee, G. P. A. Yap, E. R. Sirianni, M. P. Watson, *J. Am. Chem. Soc.*, **2013**, *135*, 280.
- [3]. T. Wang, K. Xu, T. Meng, A. Zhang, H. Wang, S. Shen, L. Liu, *Chin. J. Org. Chem.*, **2017**, *37*, 1794.
- [4]. X. -X. Wang, B. -B. Xu, W. -T. Song, K. -X. Sun, J. -M. Lu, *Org. Biomol. Chem.*, **2015**, *13*, 4925.

# Copies of the $^1\text{H}$ NMR and $^{13}\text{C}$ NMR Spectra of Complexes 3aa-3am

## $^1\text{H}$ NMR(3aa)

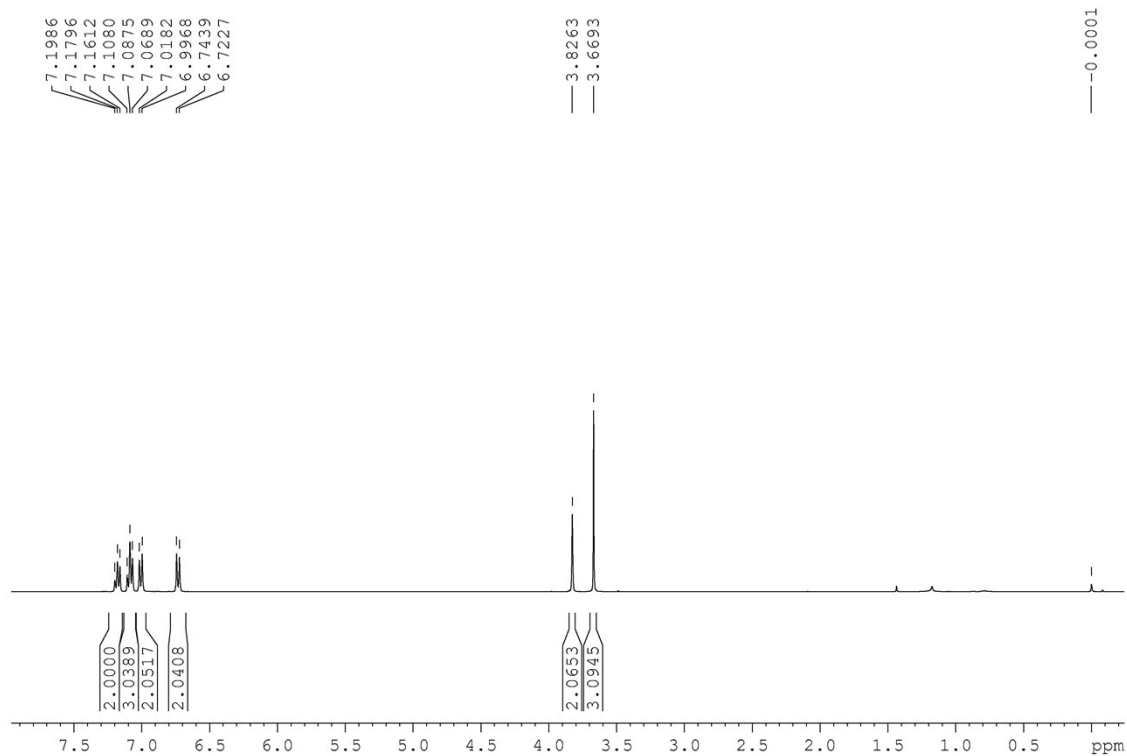

## $^{13}\text{C}$ NMR(3aa)

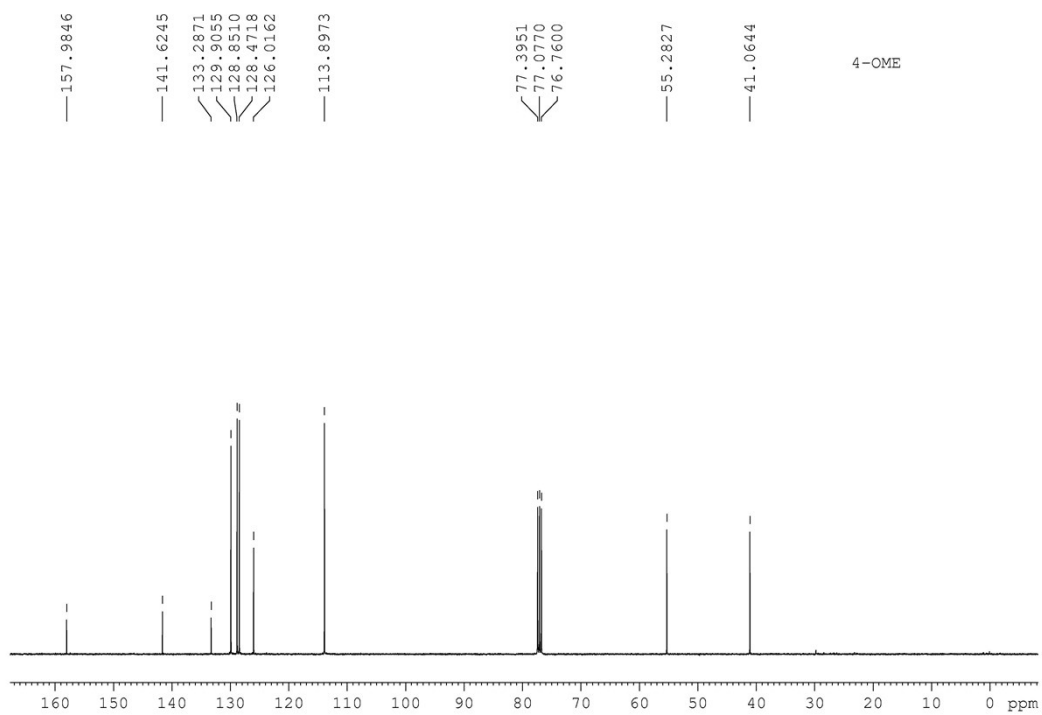

# <sup>1</sup>H NMR(3ab)

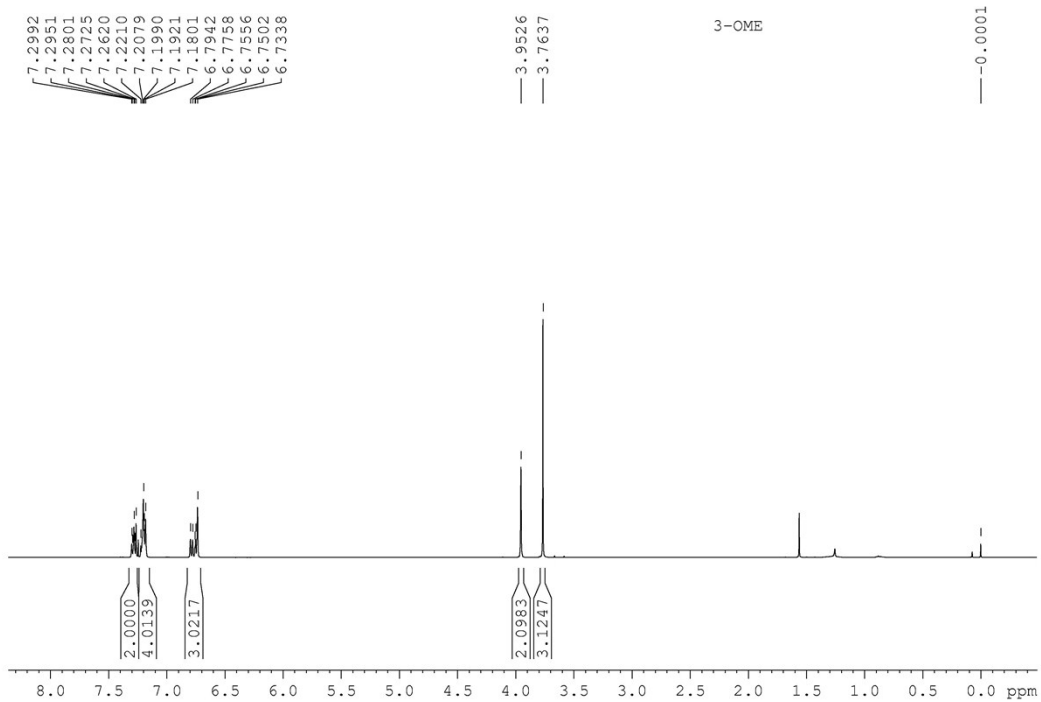

# <sup>13</sup>C NMR(3ab)

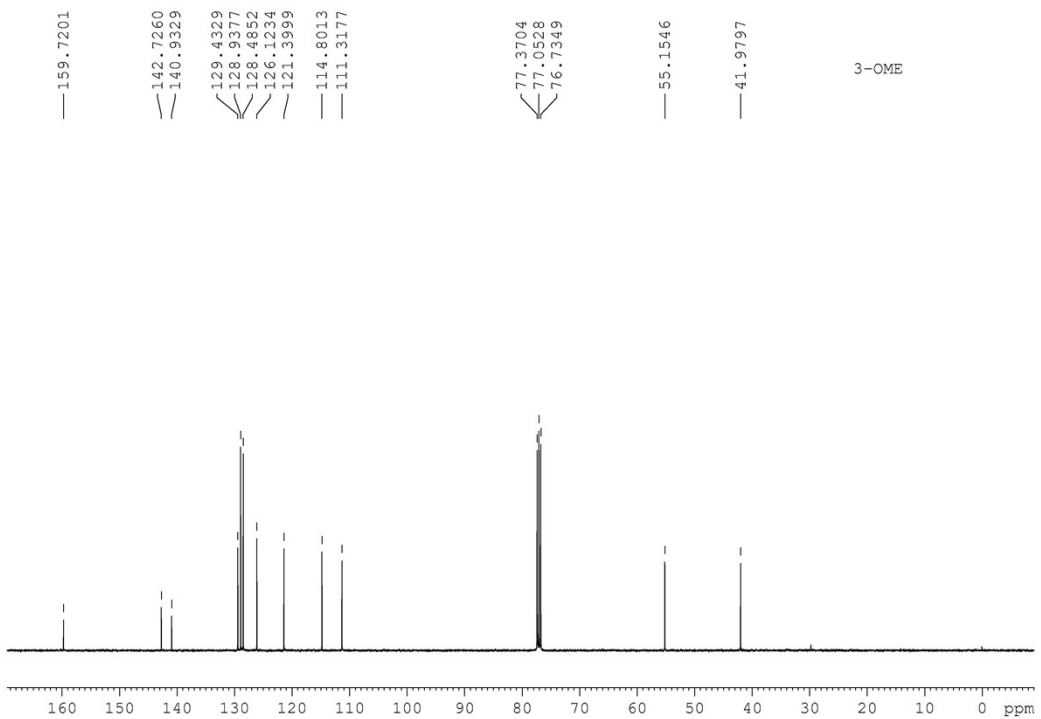

### $^1\text{H}$ NMR(3ac)

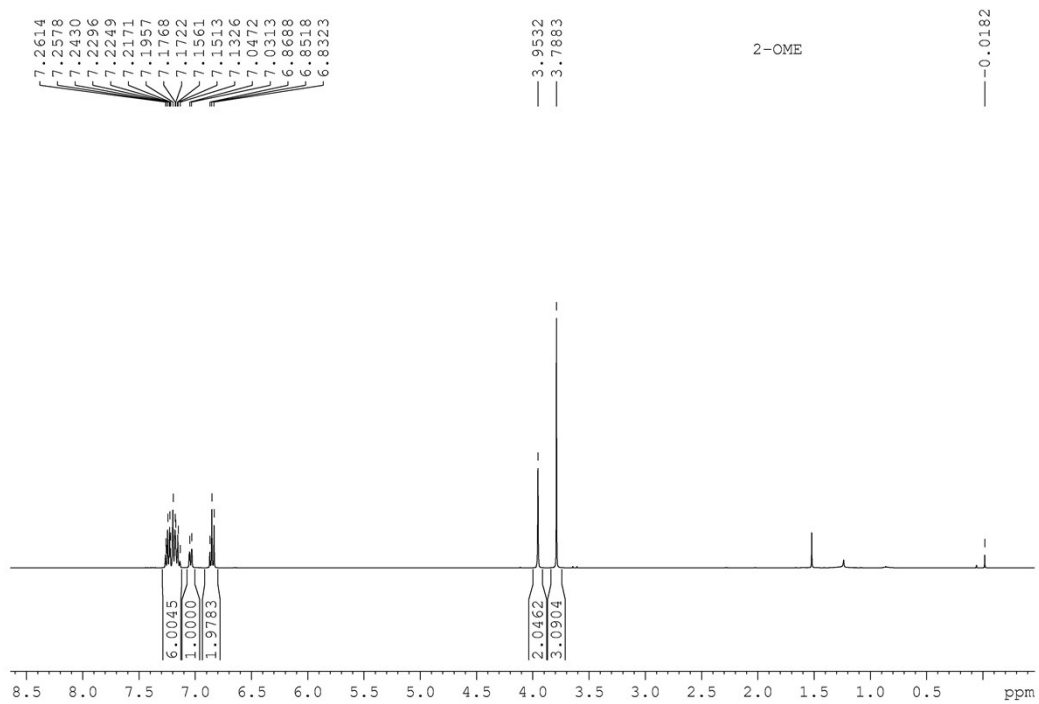

### $^{13}\text{C}$ NMR(3ac)

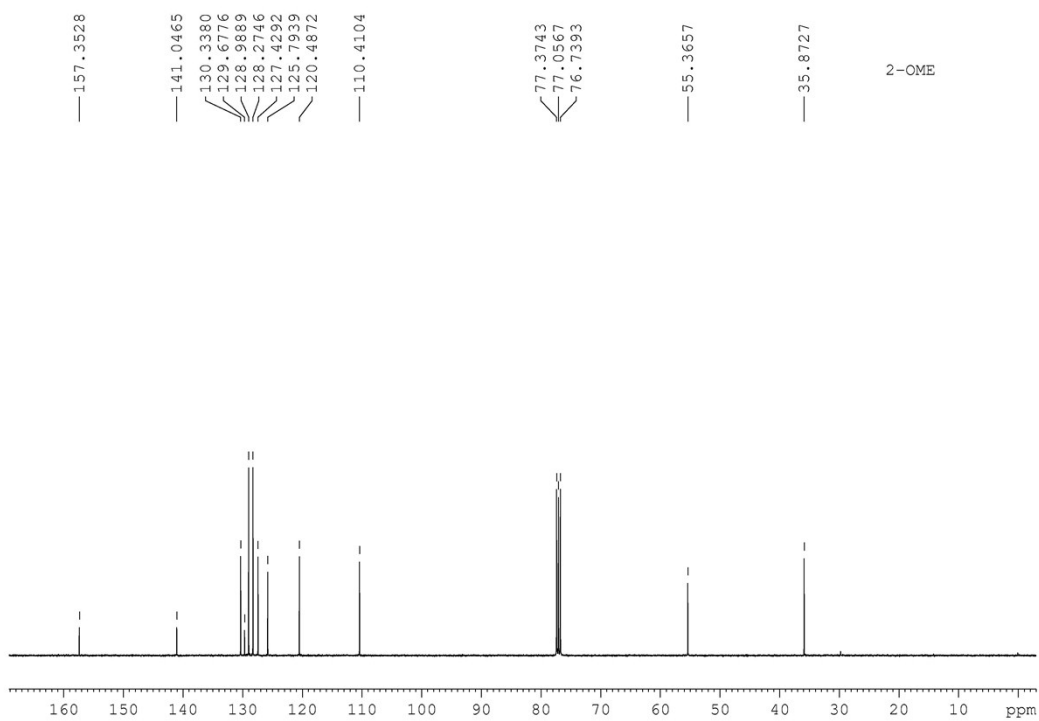



### <sup>1</sup>H NMR(3ad)

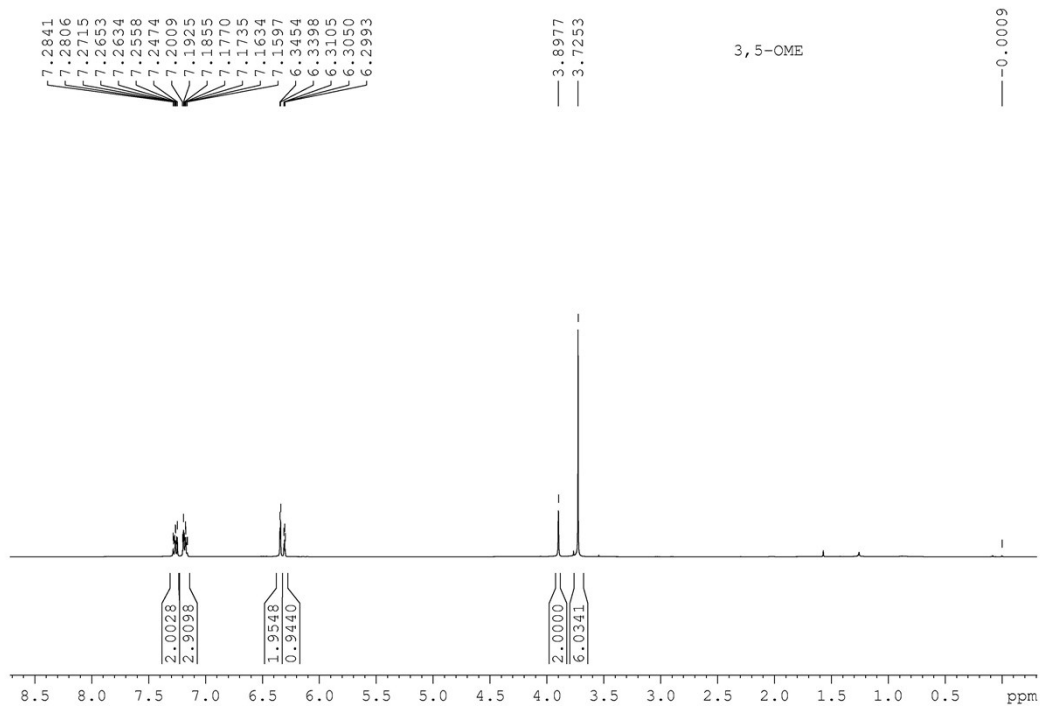

### <sup>13</sup>C NMR(3ad)

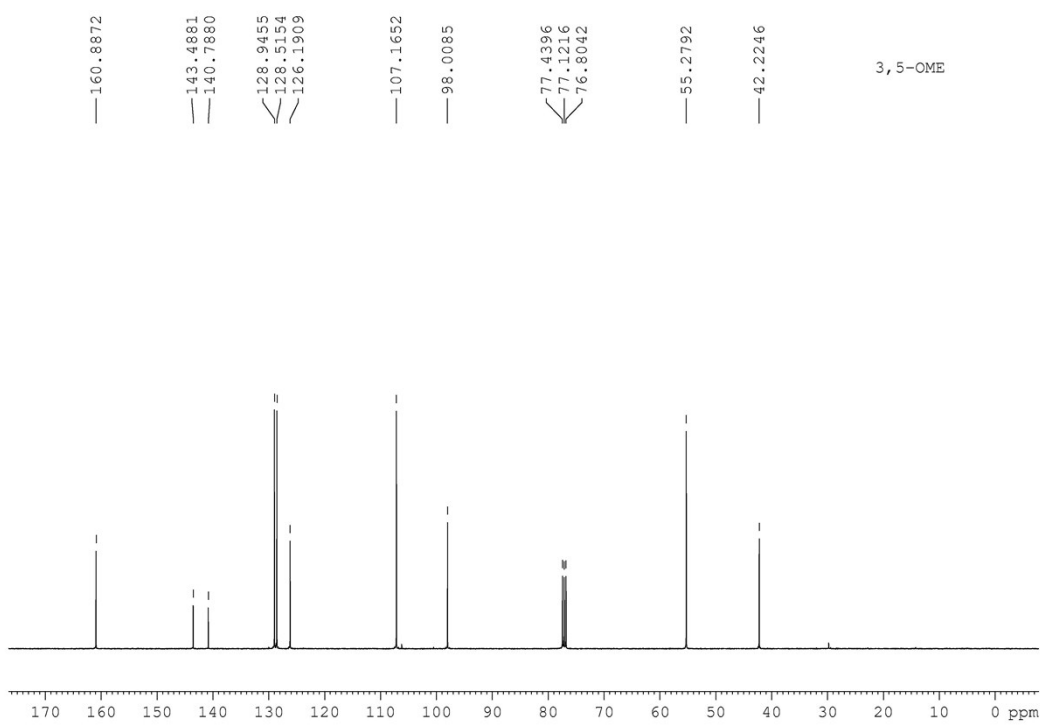

### $^1\text{H}$ NMR(3ae)

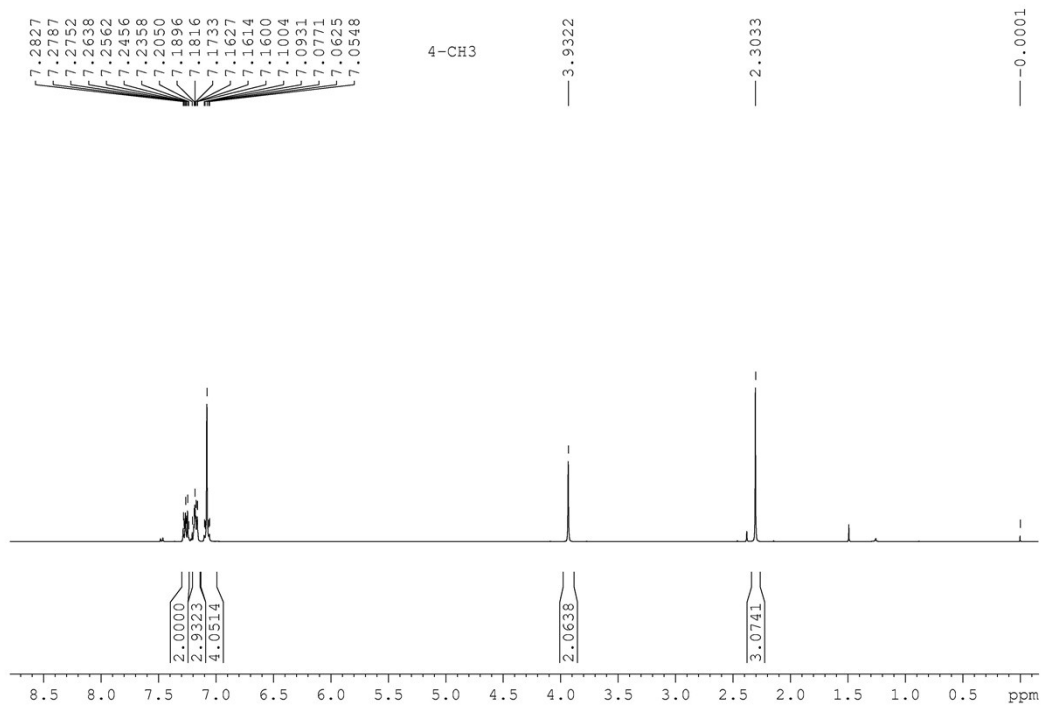

### $^{13}\text{C}$ NMR(3ae)

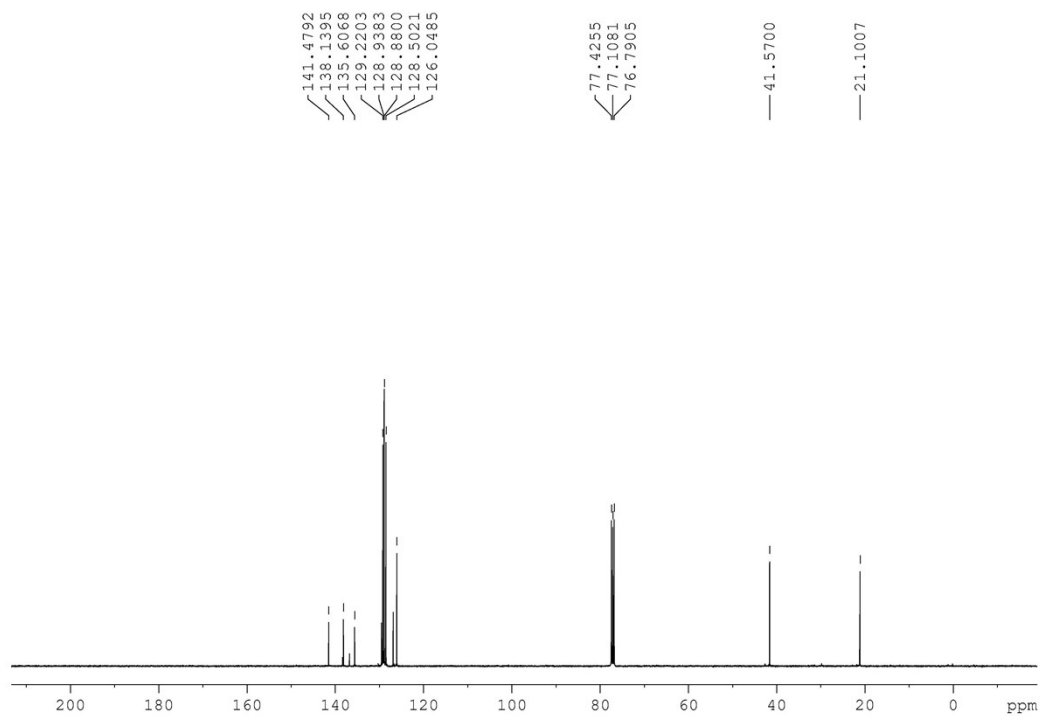

### <sup>1</sup>H NMR(3af)

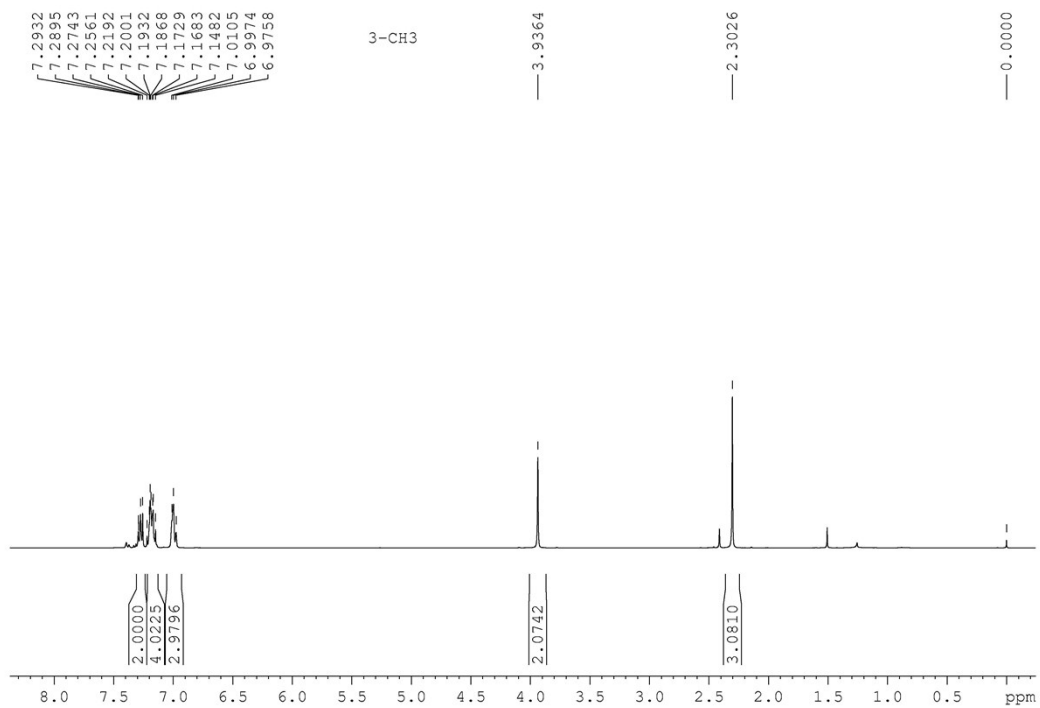

### <sup>13</sup>C NMR(3af)

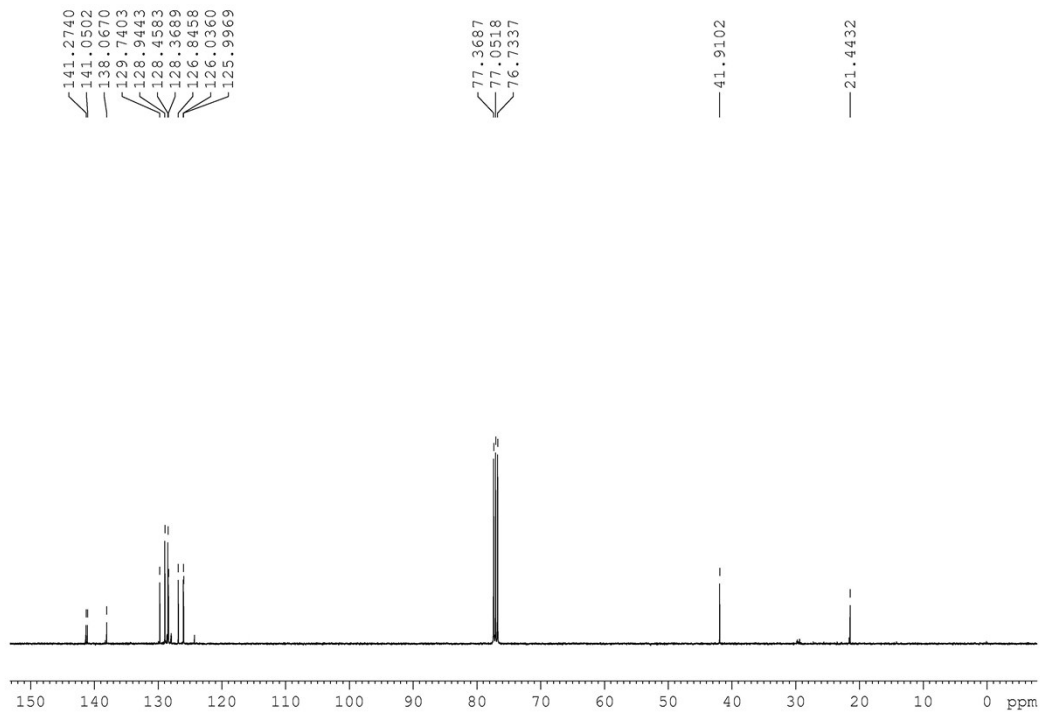

### <sup>1</sup>H NMR(3ag)

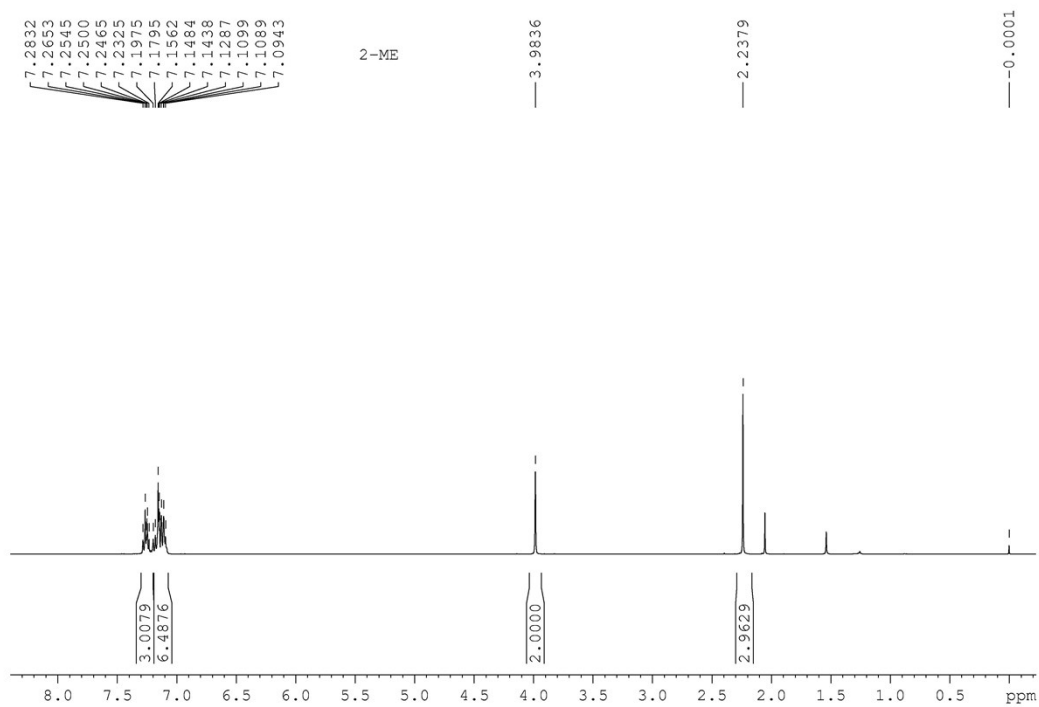

### <sup>13</sup>C NMR(3ag)

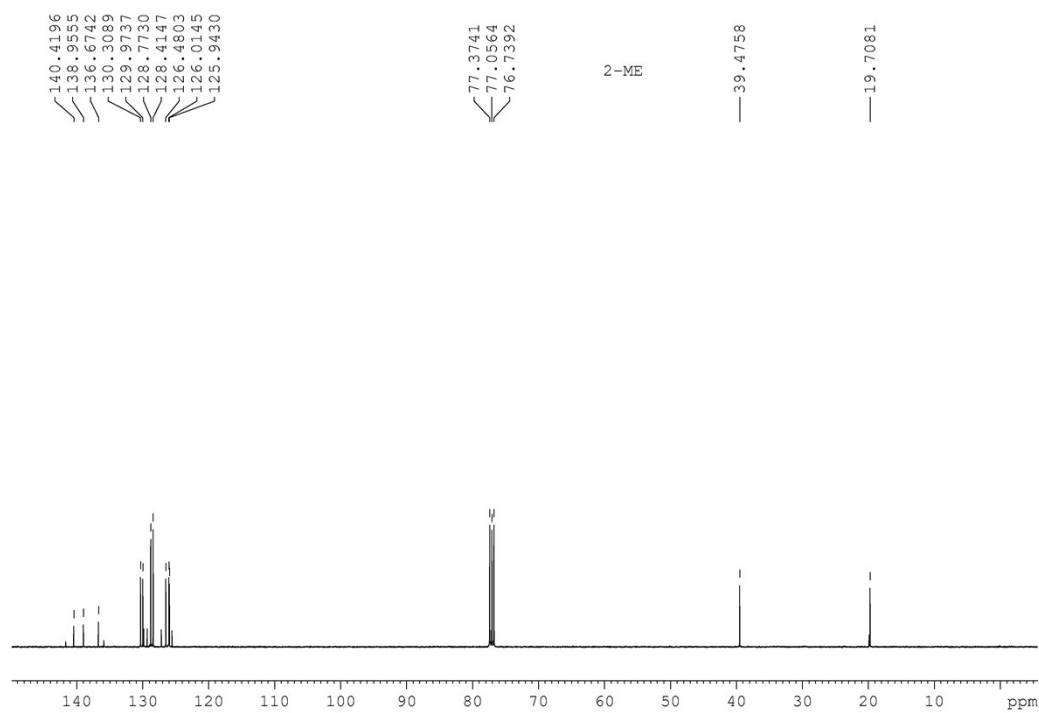

### <sup>1</sup>H NMR(3ah)

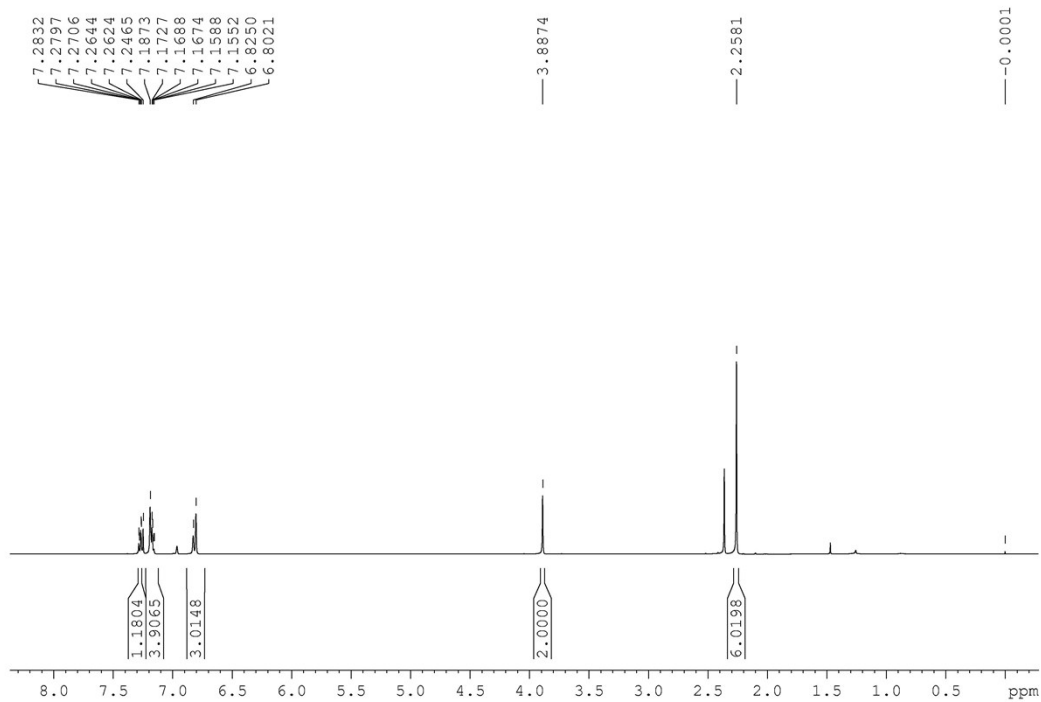

### <sup>13</sup>C NMR(3ah)

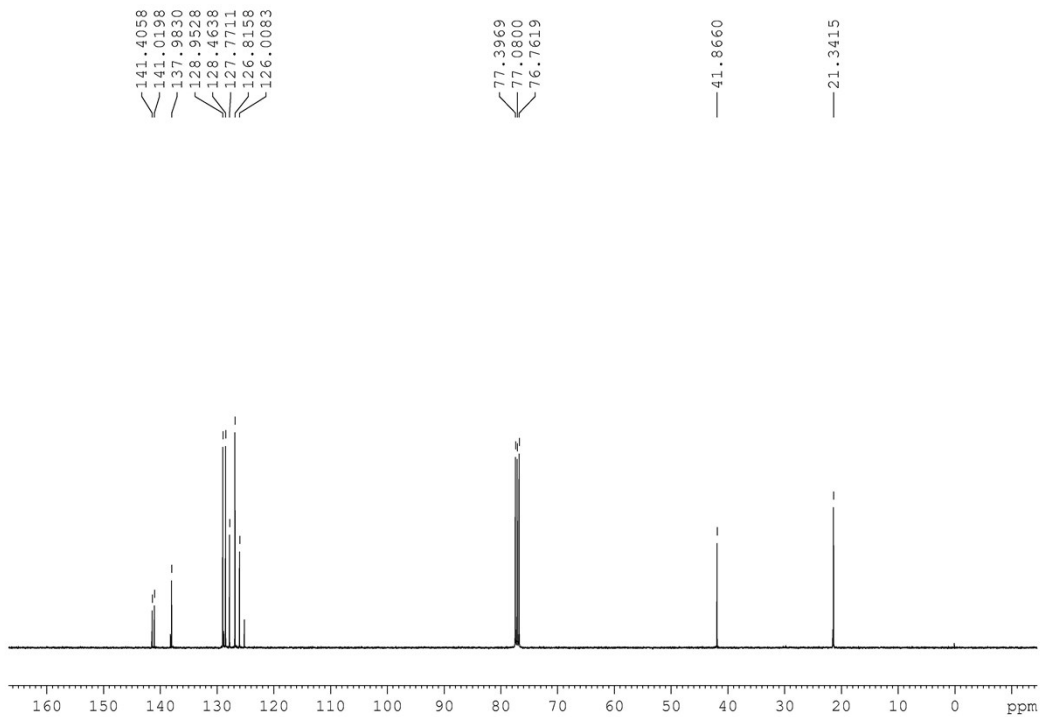

### <sup>1</sup>H NMR(3ai)

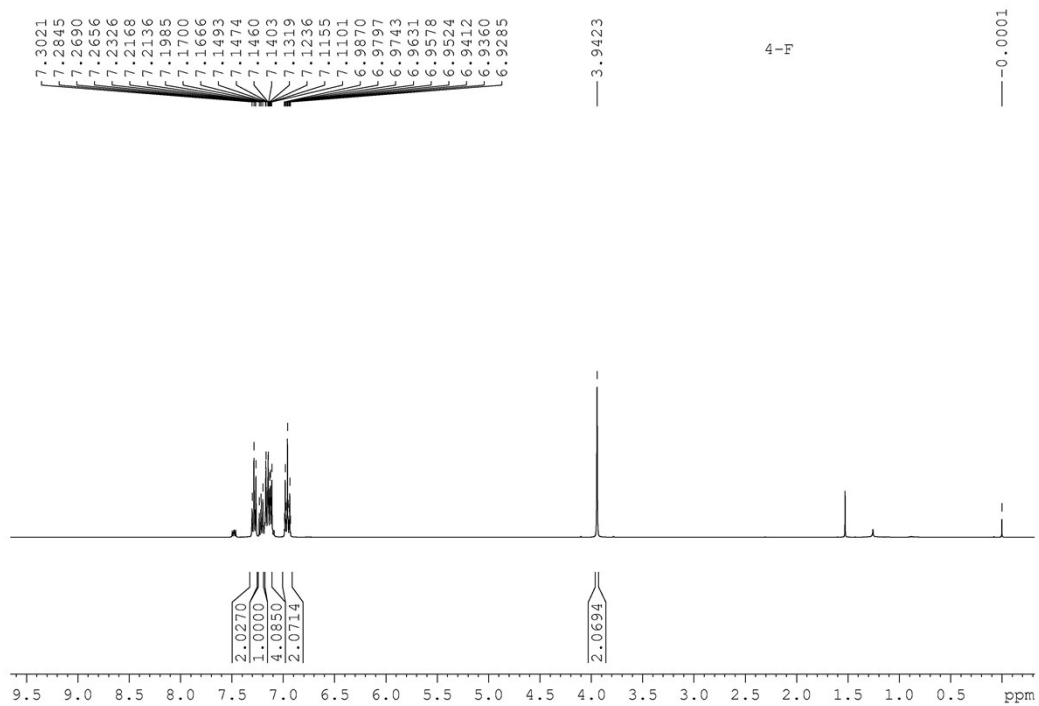

### <sup>13</sup>C NMR(3ai)

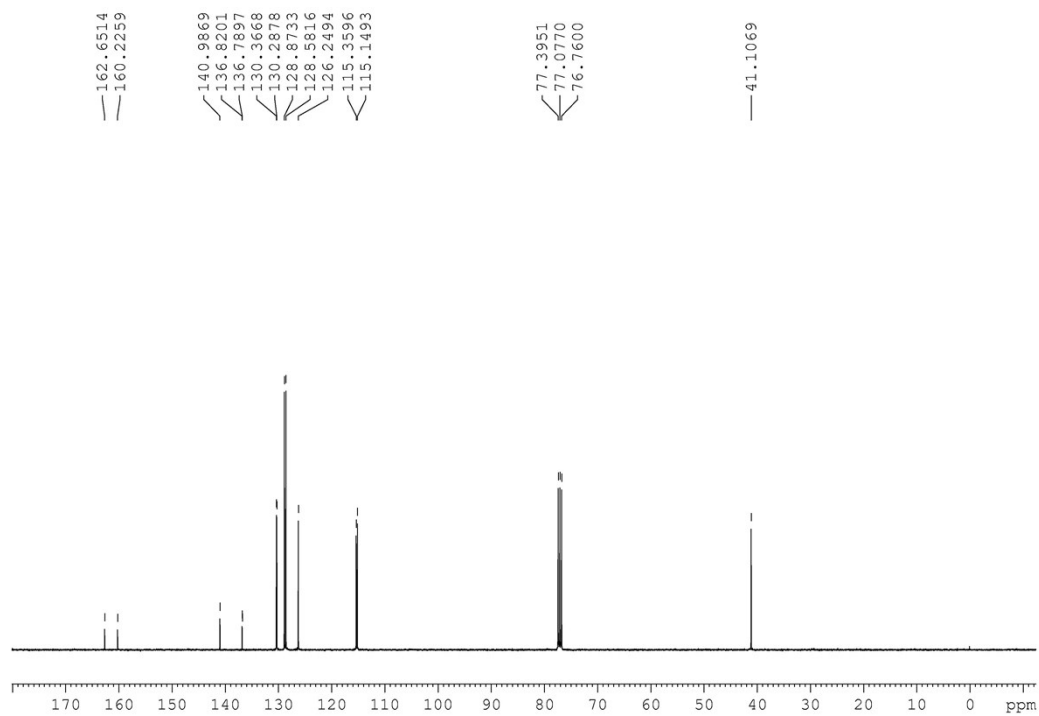

<sup>1</sup>H NMR(3aj)

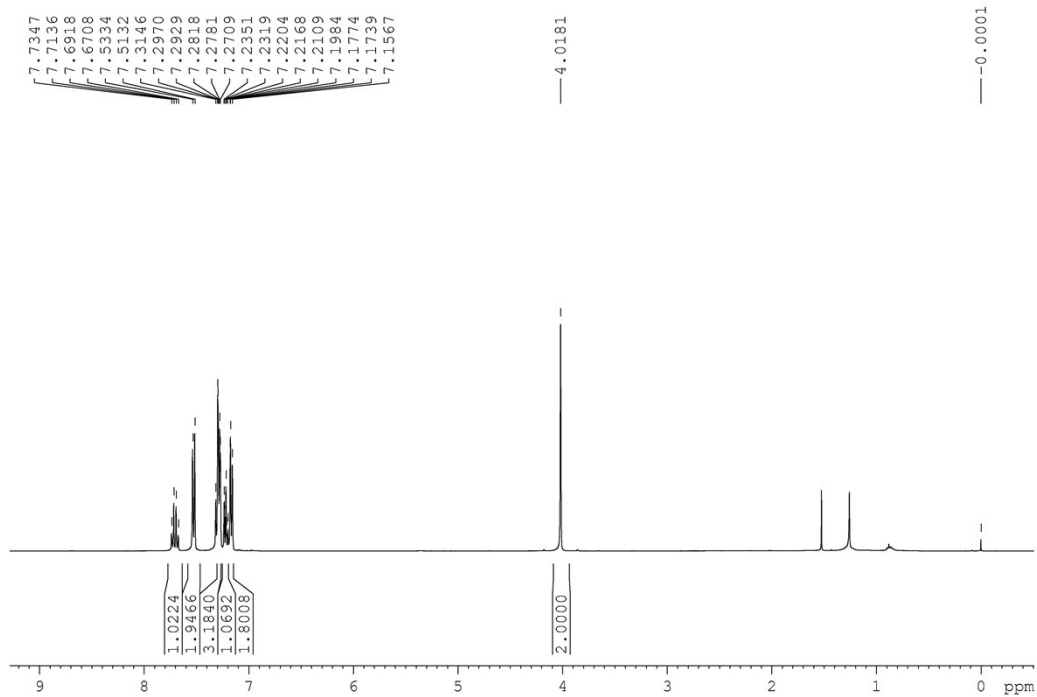

<sup>13</sup>C NMR(3aj)

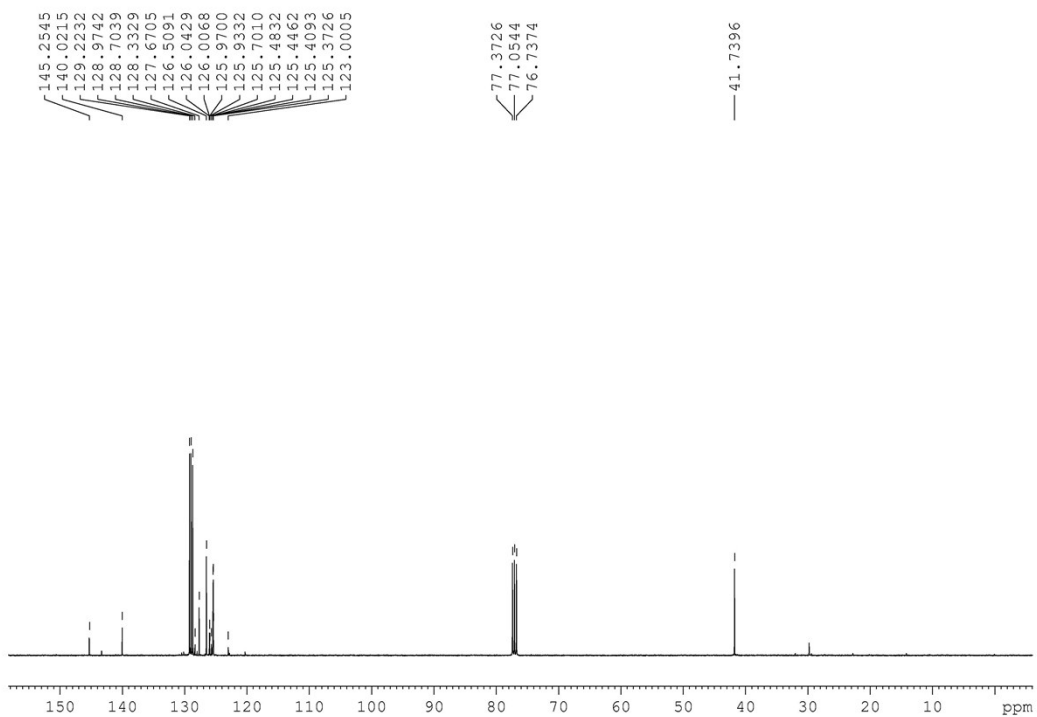

<sup>1</sup>H NMR(3ak)

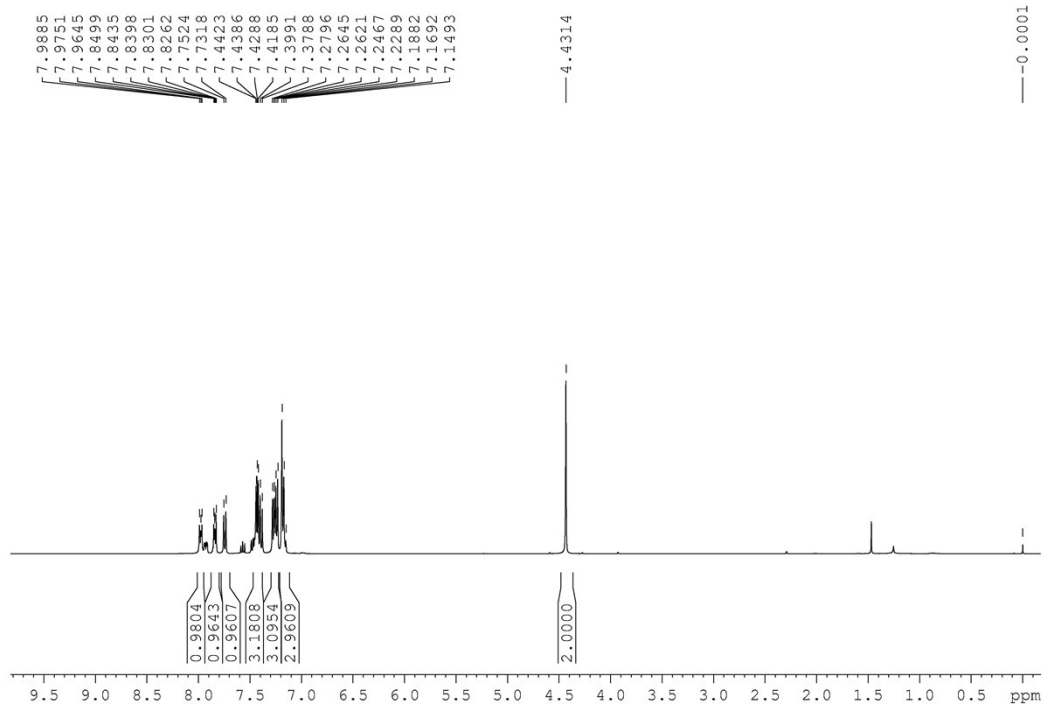

<sup>13</sup>C NMR(3ak)

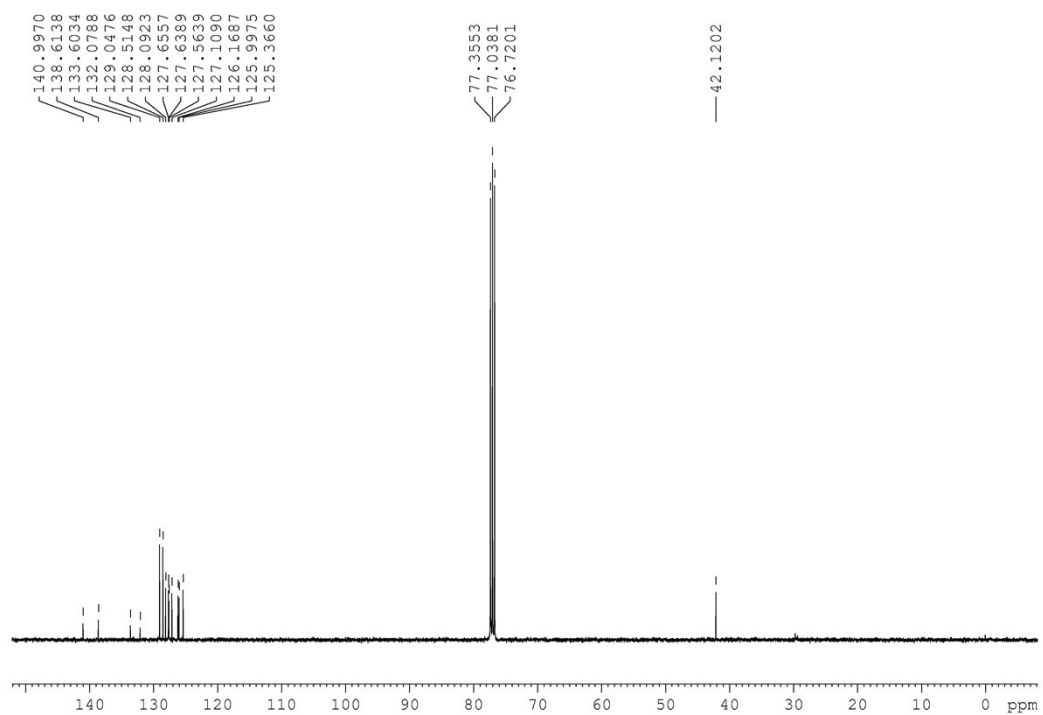



<sup>1</sup>H NMR(3al)

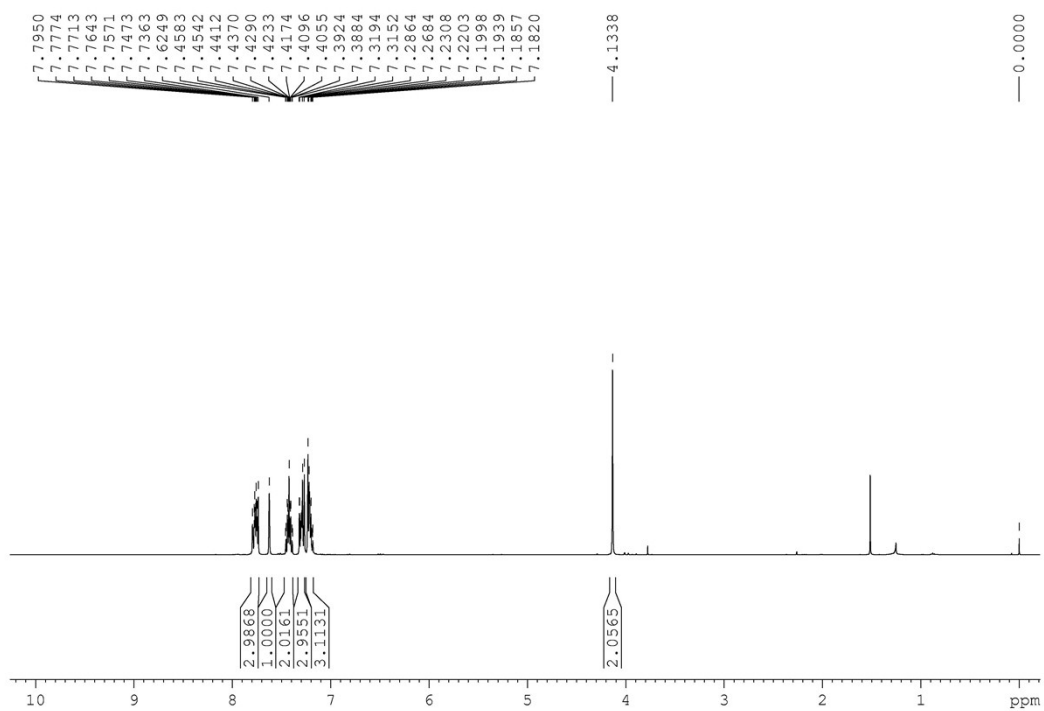

<sup>13</sup>C NMR(3al)

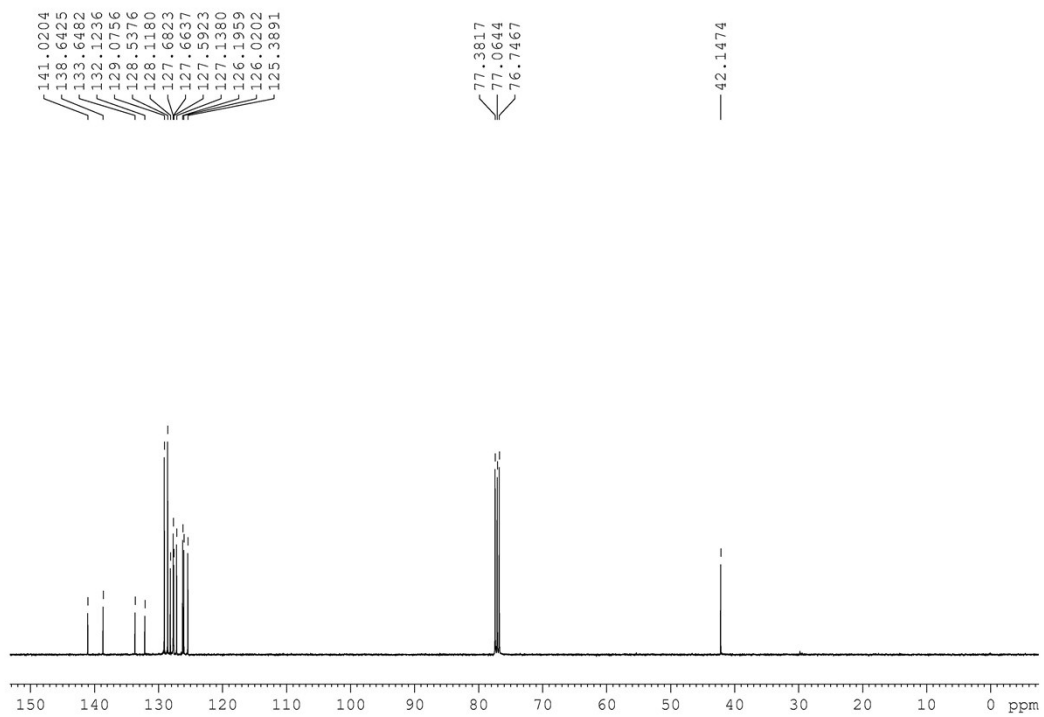

### $^1\text{H}$ NMR(3am)

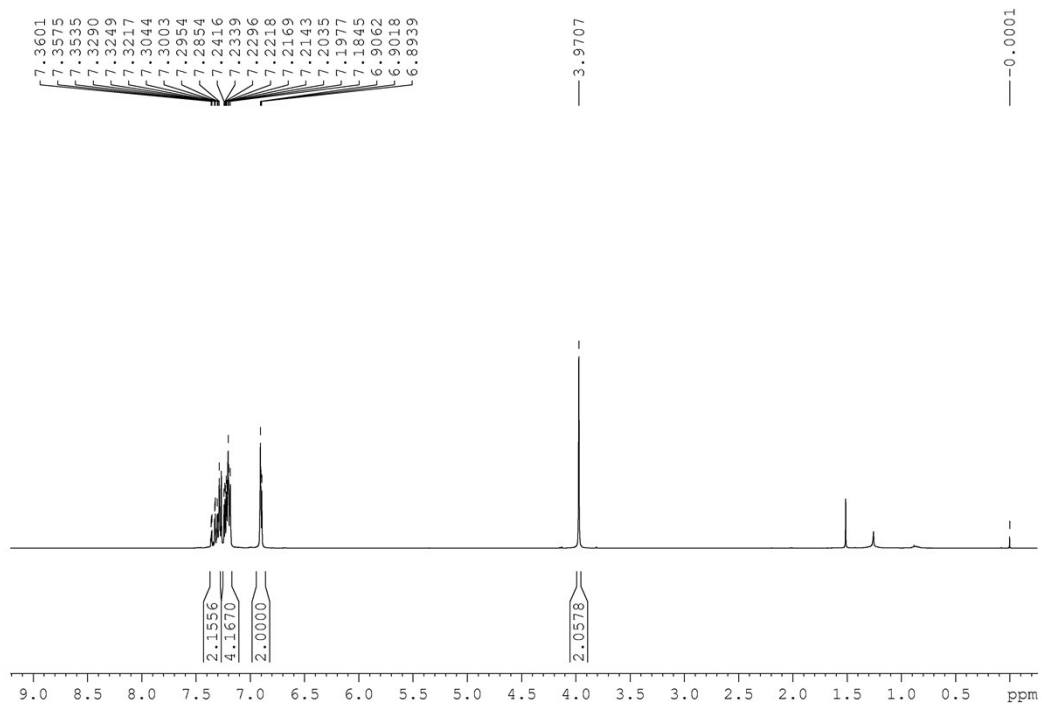

### $^{13}\text{C}$ NMR(3am)

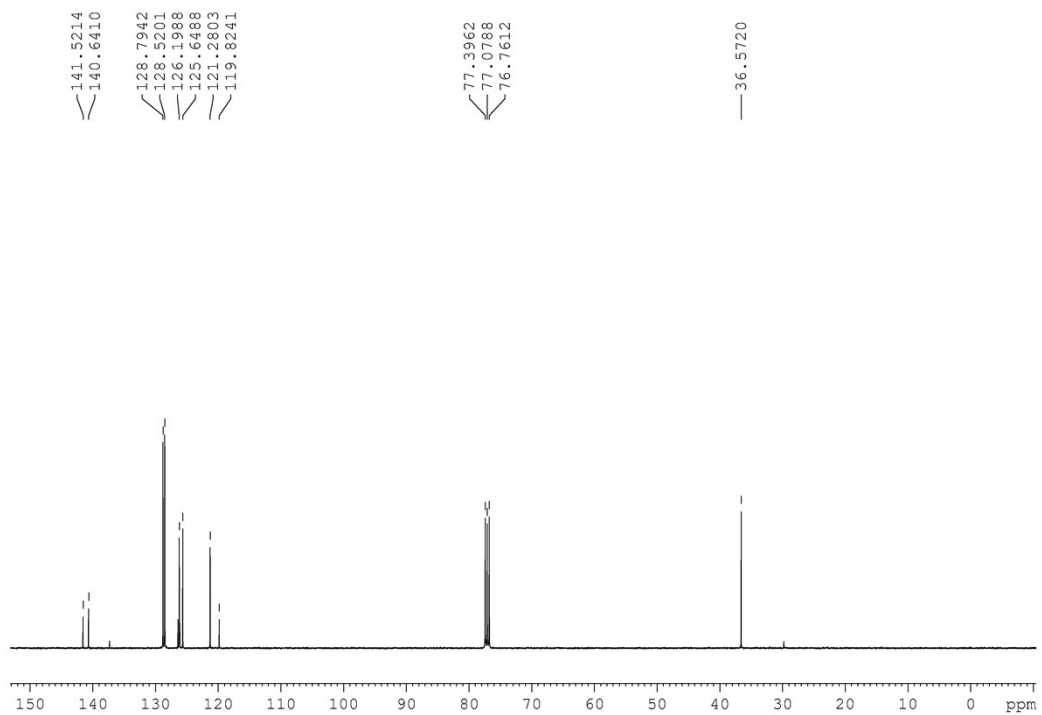

# Copies of the $^1\text{H}$ NMR and $^{13}\text{C}$ NMR Spectra of Complexes 3ba-3bi

## $^1\text{H}$ NMR(3ba)

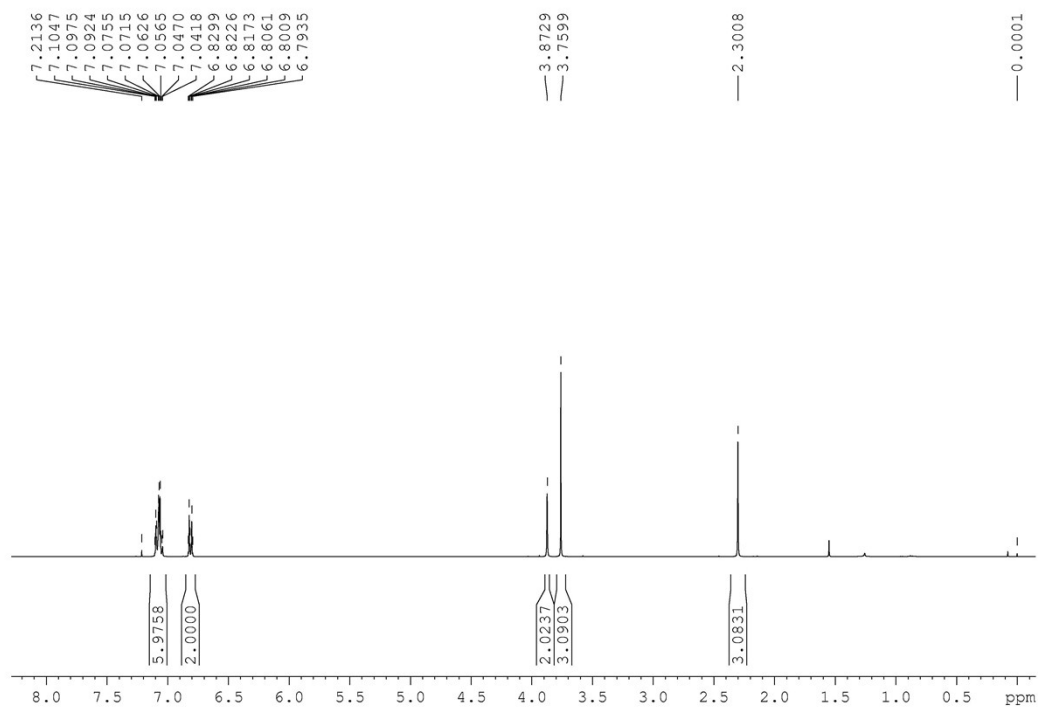

## $^{13}\text{C}$ NMR(3ba)

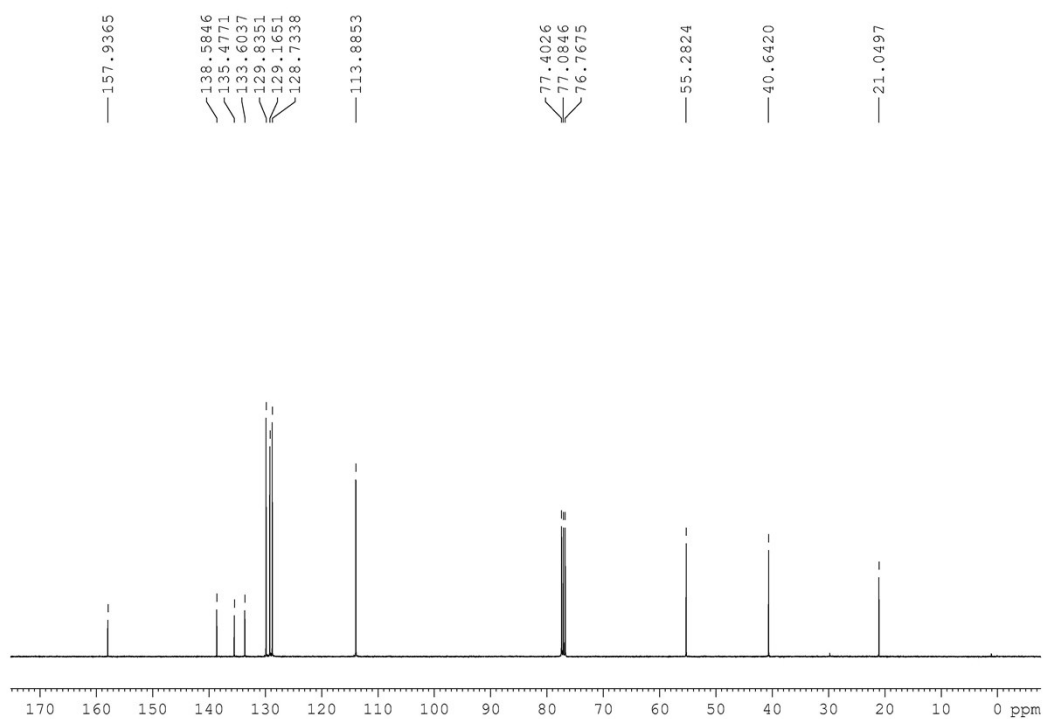

# <sup>1</sup>H NMR(3bb)

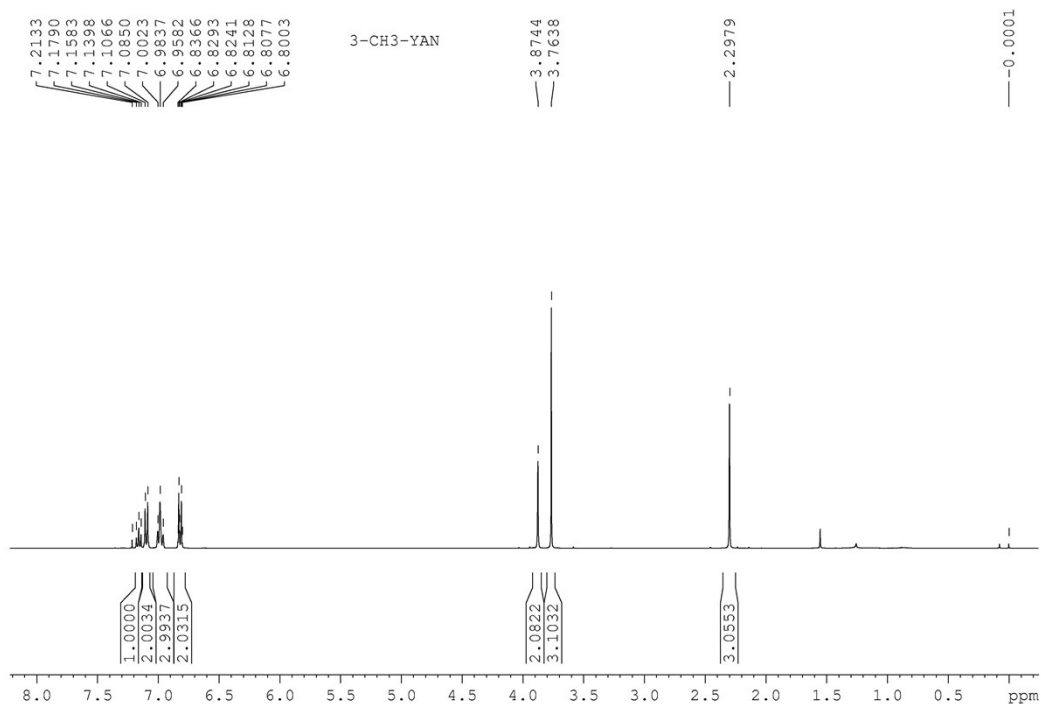

# <sup>13</sup>C NMR(3bb)

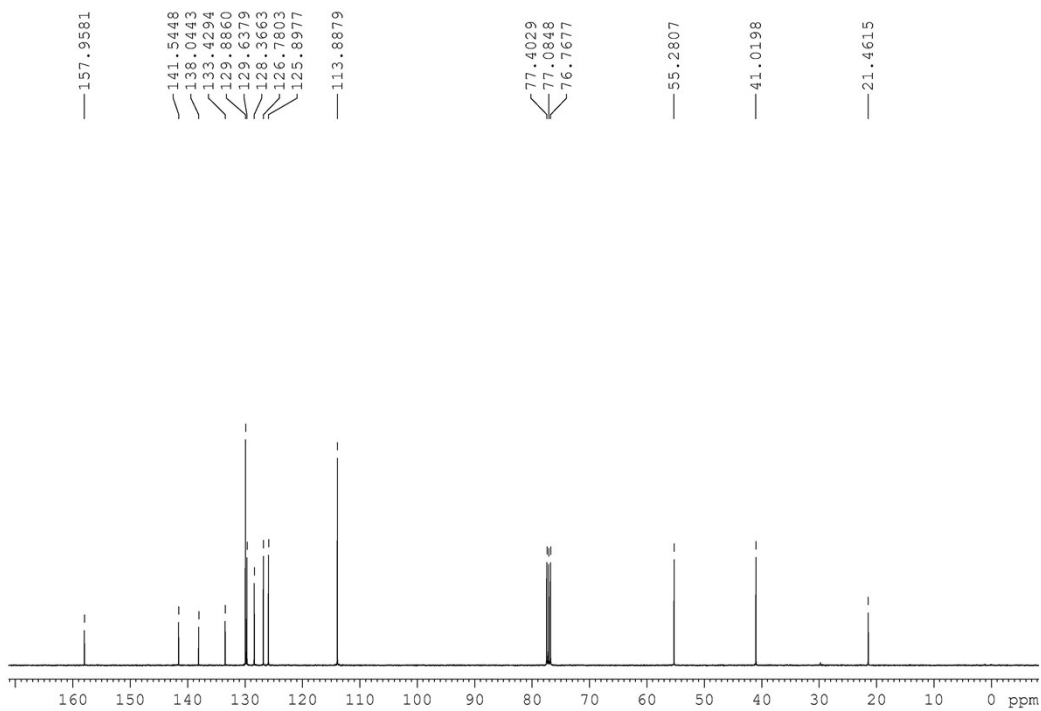

# <sup>1</sup>H NMR(3bc)

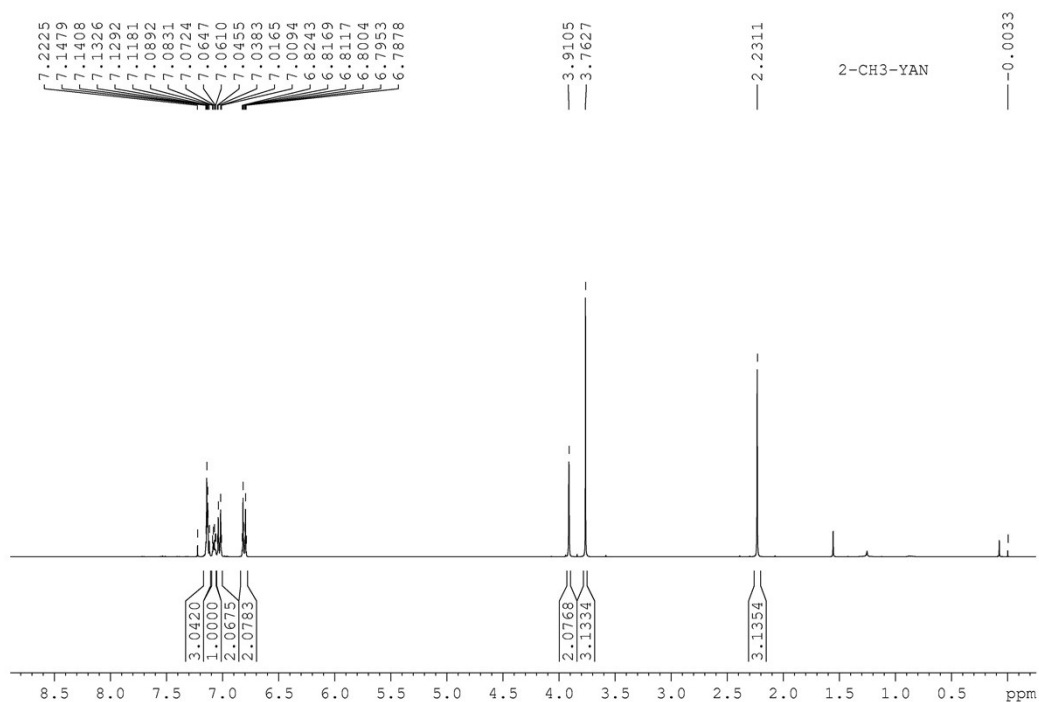

# <sup>13</sup>C NMR(3bc)

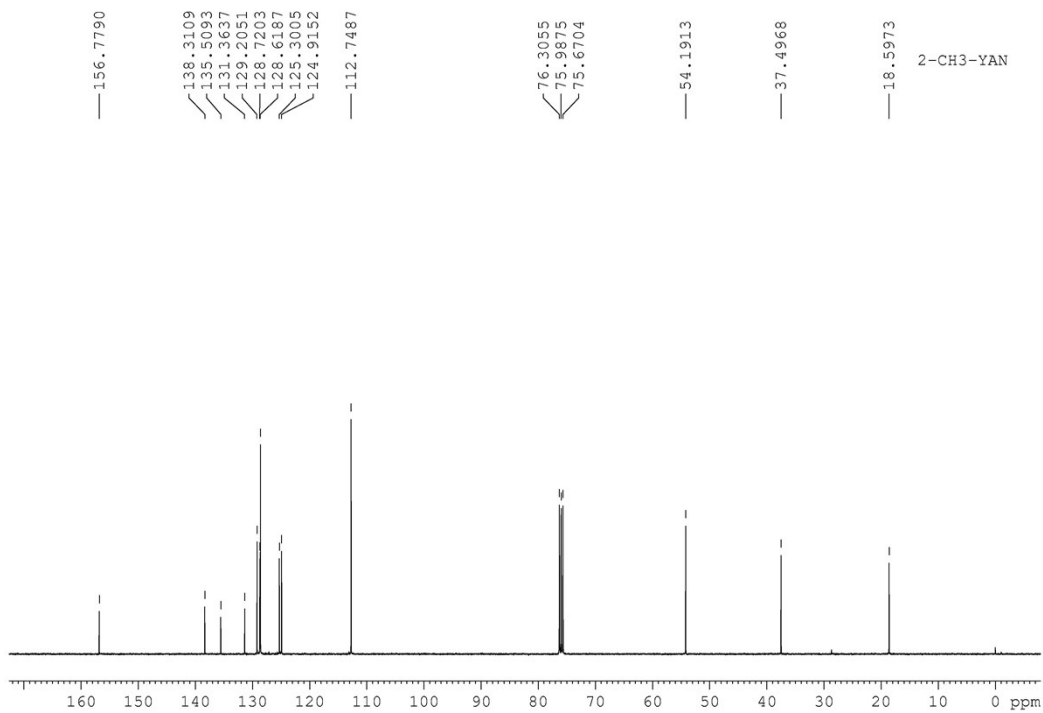

# <sup>1</sup>H NMR(3bd)

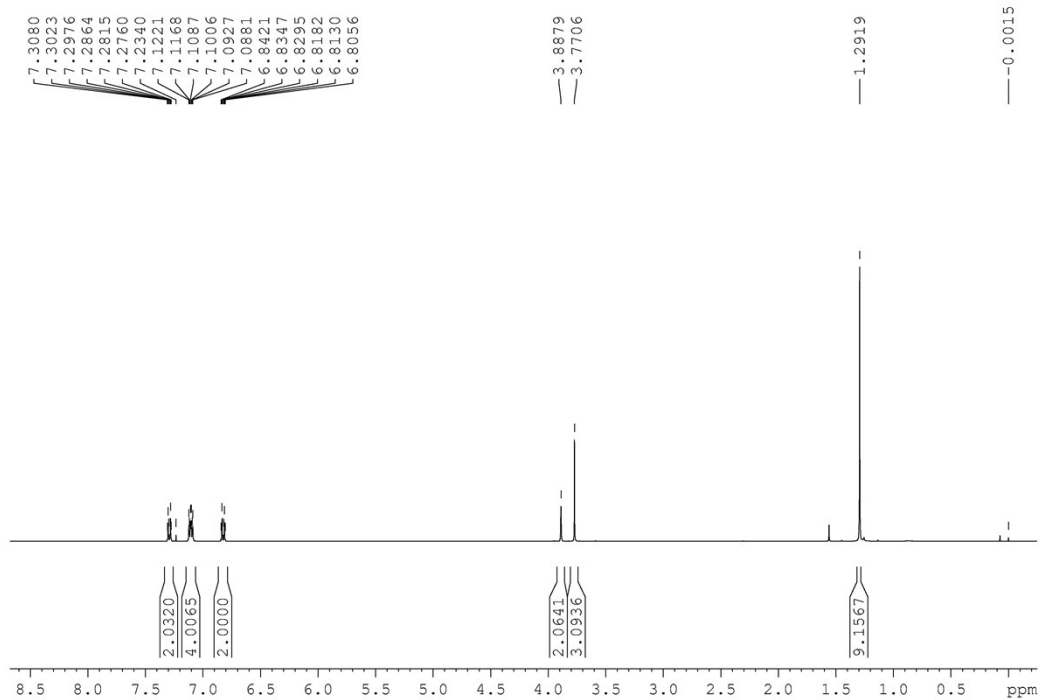

# <sup>13</sup>C NMR(3bd)

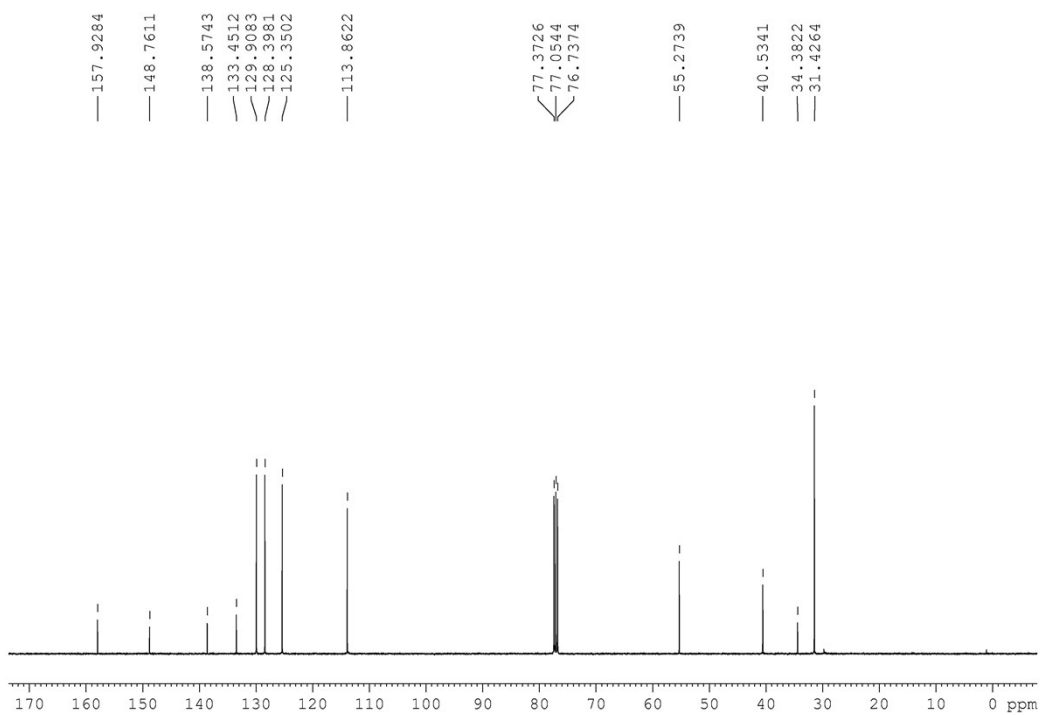

### $^1\text{H}$ NMR(3be)

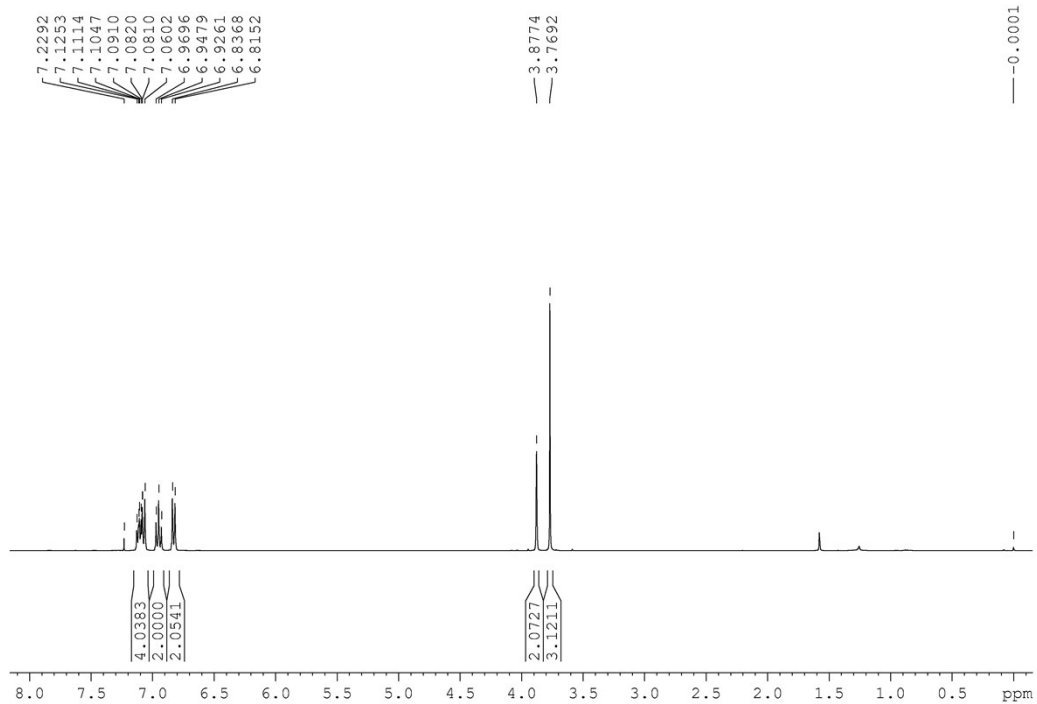

### $^{13}\text{C}$ NMR(3be)

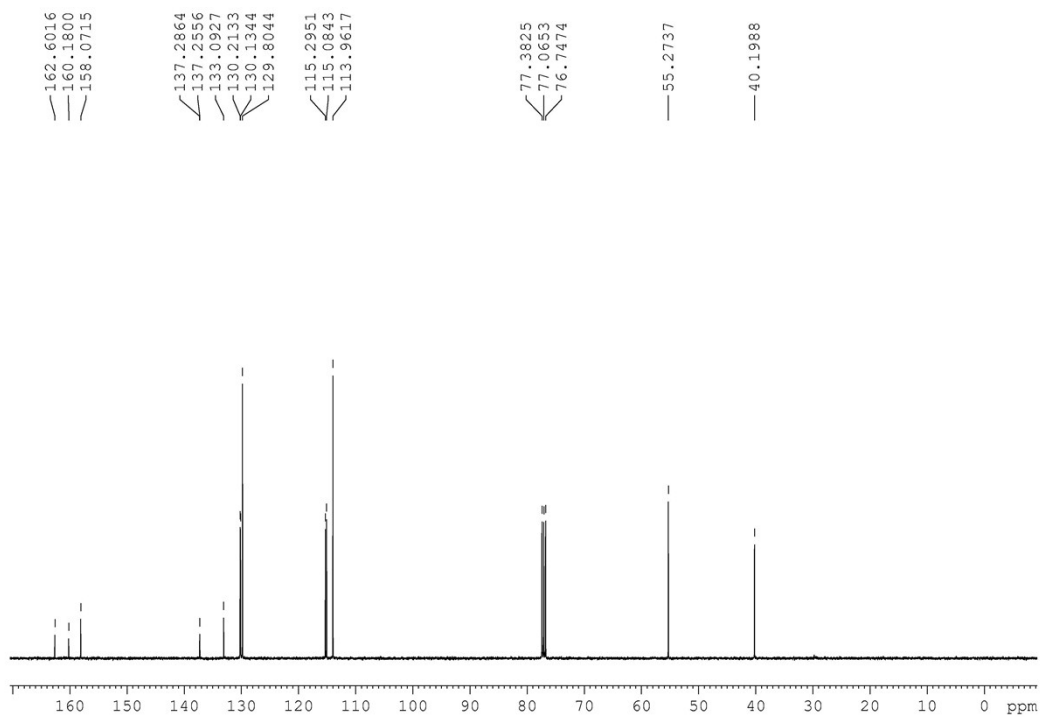

# <sup>1</sup>H NMR(3bf)

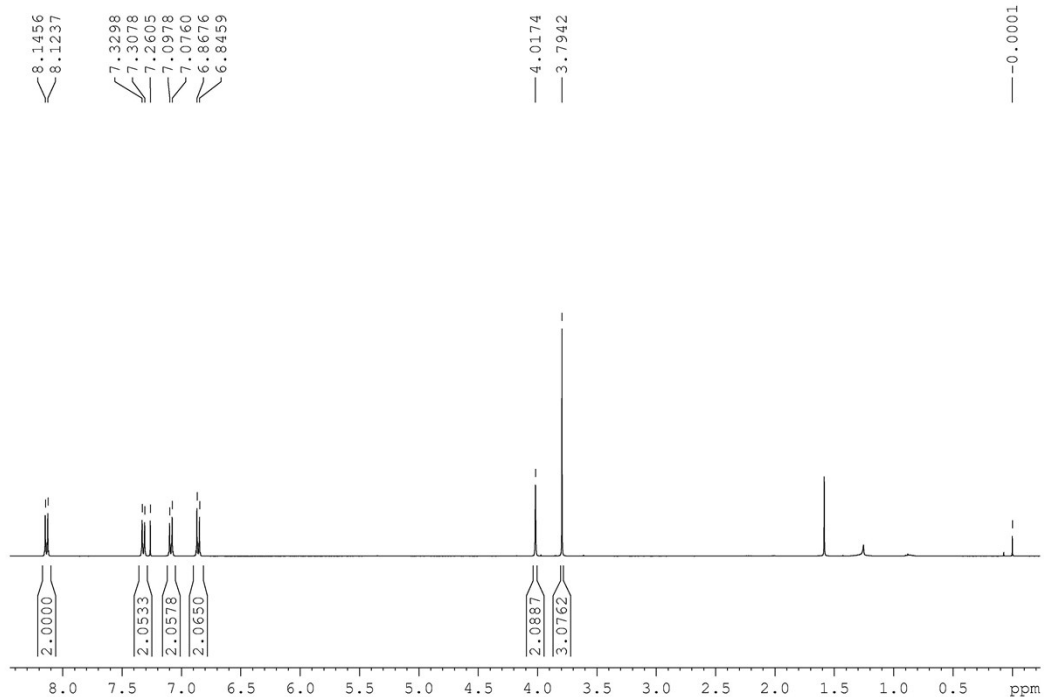

# <sup>13</sup>C NMR(3bf)

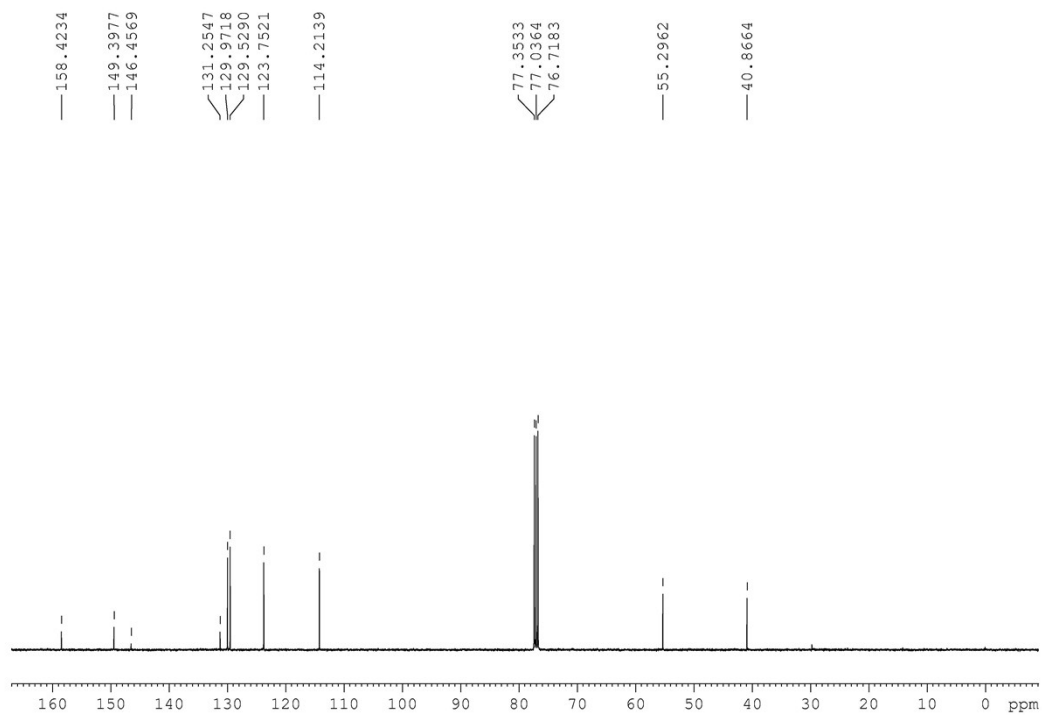



# <sup>1</sup>H NMR(3bg)

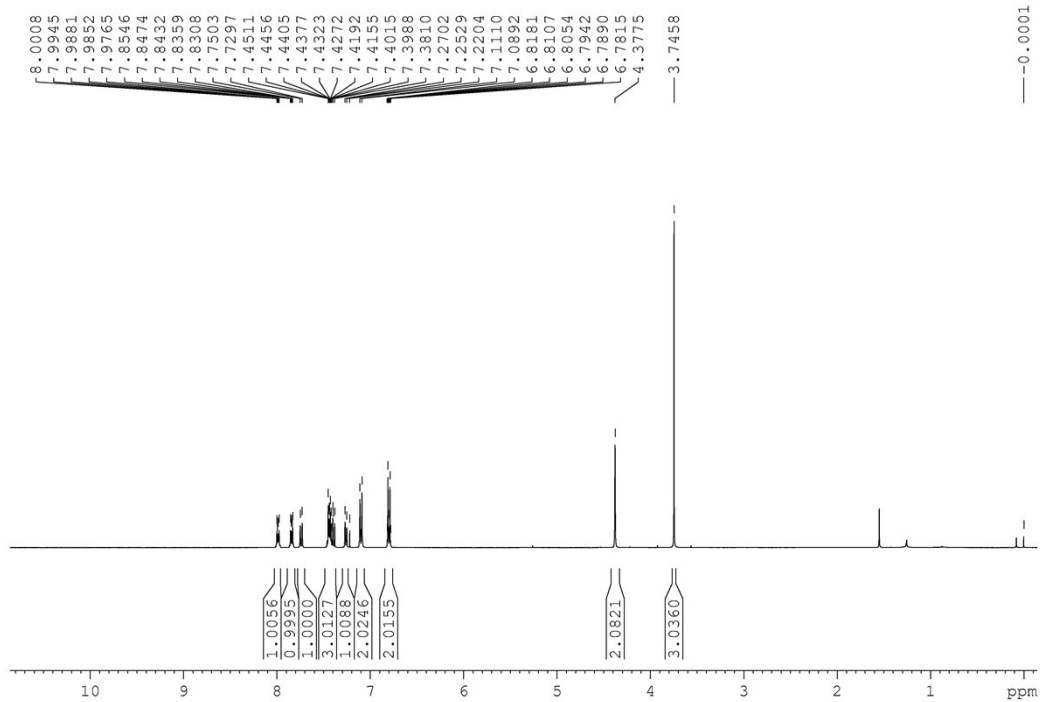

# <sup>13</sup>C NMR(3bg)

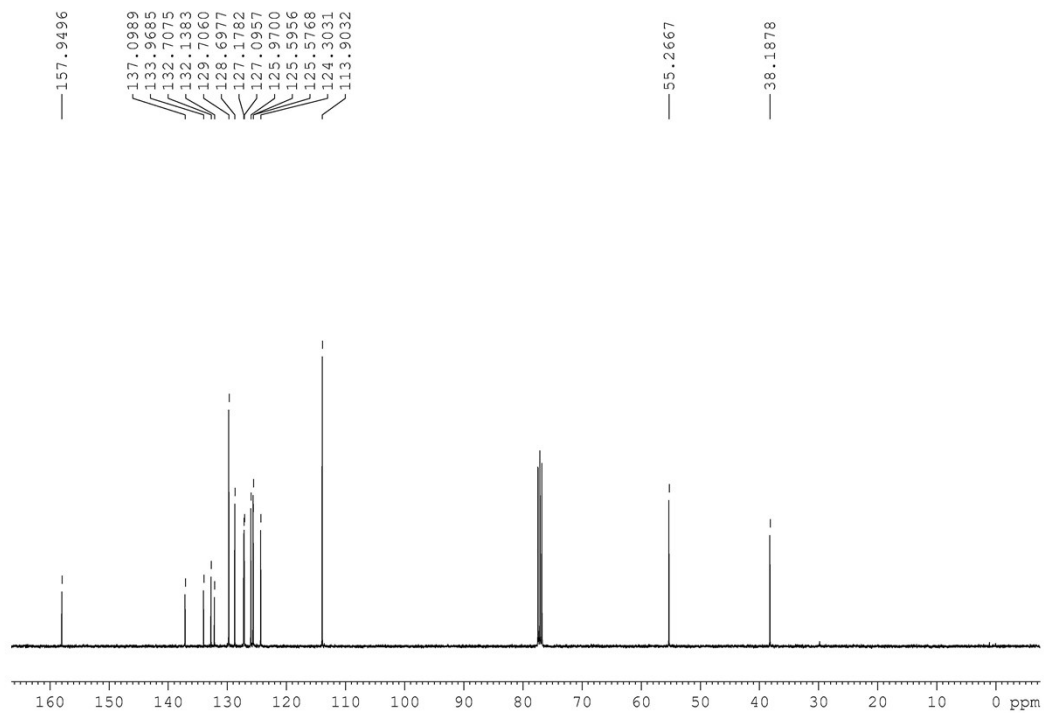

# <sup>1</sup>H NMR(3bh)

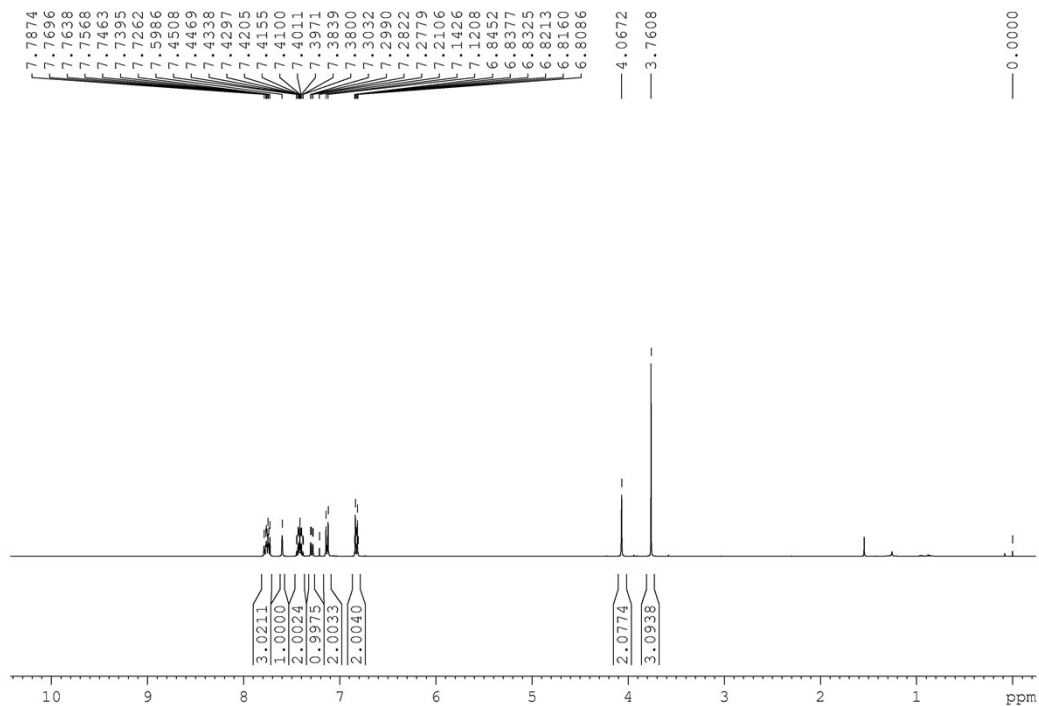

# <sup>13</sup>C NMR(3bh)

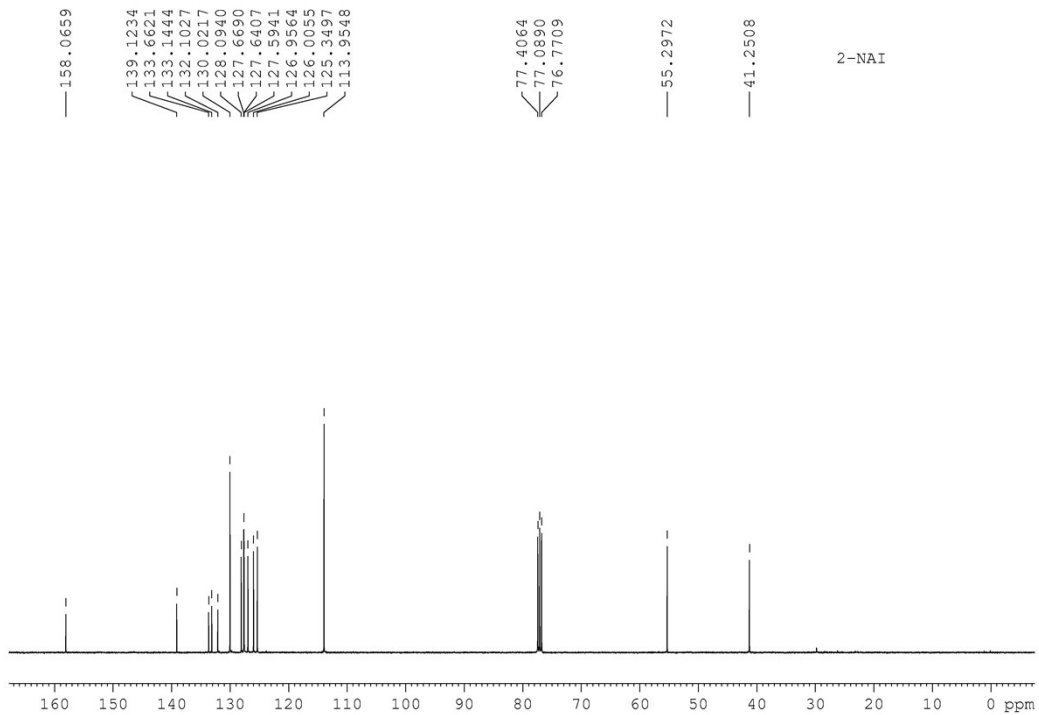

### <sup>1</sup>H NMR(3bi)

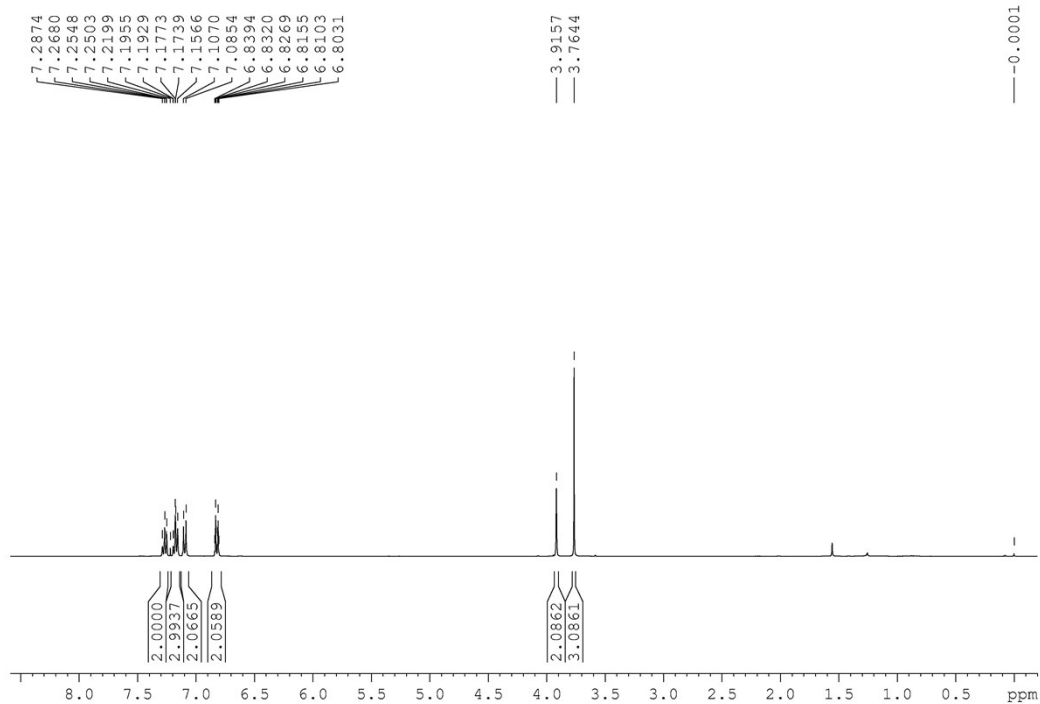

### <sup>13</sup>C NMR(3bi)

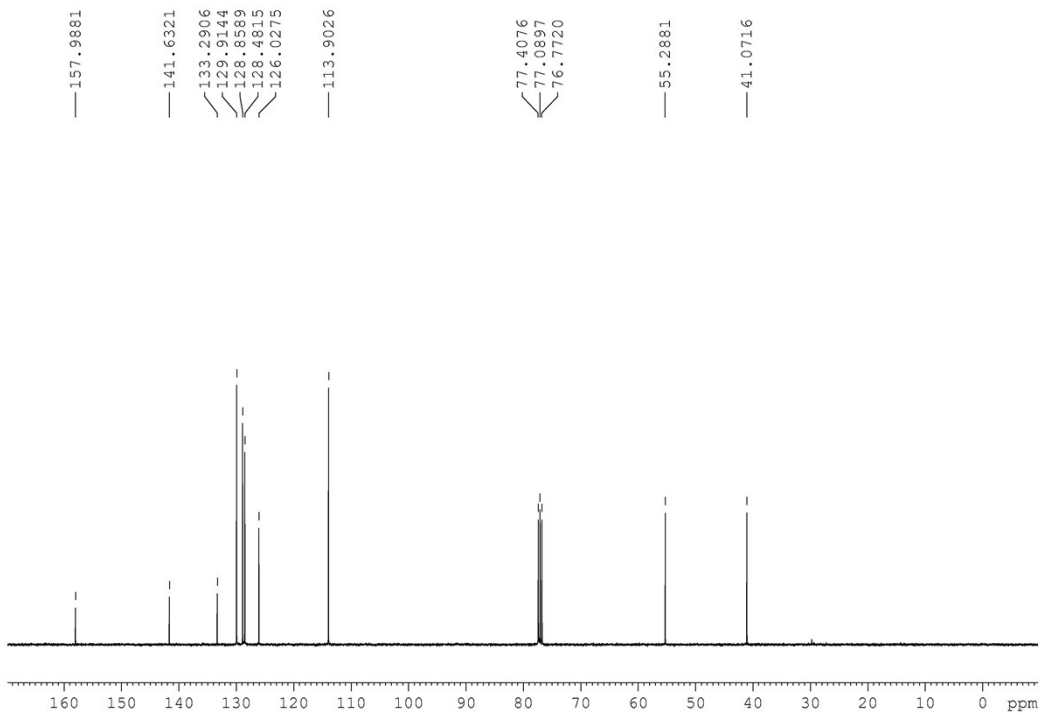

# Copies of the GC-MS Spectra of New Catalytic Products

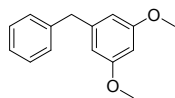

**3ad**

Chemical Formula: C<sub>15</sub>H<sub>16</sub>O<sub>2</sub>  
Exact Mass: 228.1

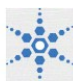

## ChemLab Technologies - GC/MS Report

|                            |                             |                             |                      |
|----------------------------|-----------------------------|-----------------------------|----------------------|
| Data File:                 | 0131-5568WT-1               | Original Data Path:         | E:\GCMS Data\ChemLab |
| Current Data Path:         | E:\GCMS Data\ChemLab        | Sample Type:                | Unknown              |
| Sample ID:                 | 7                           | Sample Name:                |                      |
| Operator:                  | W. T                        | Acquisition Date:           | 02/03/19 01:37:53 AM |
| Run Time(min):             | 14.10                       | Comments:                   |                      |
| Vial:                      | 5                           | Injection Volume(μl):       | 10.00                |
| Scans:                     | 4148                        | Low Mass(m/z):              | 50                   |
| High Mass(m/z):            | 400                         | Sample Volume(μl):          | 0.00                 |
| Sample Weight:             | 0.00                        | ISTD Amount:                | 0.000                |
| Calibration Level:         |                             | Dilution Factor:            | 1.00                 |
| Instrument Method:         | E:\GCMS Methods\ChemLab\CLT | Original Processing Method: |                      |
| Current Processing Method: | N/A                         | Calibration File:           | N/A                  |

```

Method type: Acquisition - General
MS transfer line temperature: 270 °C
Ion source temperature: 220 °C
Use acquisition threshold: No
Ionization mode: EI
Run completion: GC run time
Segment #1:
Start time: 3 min
Filament/multiplier/dynode on: Yes
Chromatography filter on: Yes
Chrom. filter peak width time: 1 sec
Use tune file emission current: Yes
Use last tuned detector gain: Yes
Use tune file electron energy: No
Electron energy: 70 eV
Calibration gas: Off
Scan #1
Tune file: (Last Saved)
Ion polarity: Positive
Data type: Centroid
Start mass: 50 amu
End mass: 400 amu
Scan time: 0.2 sec
    
```

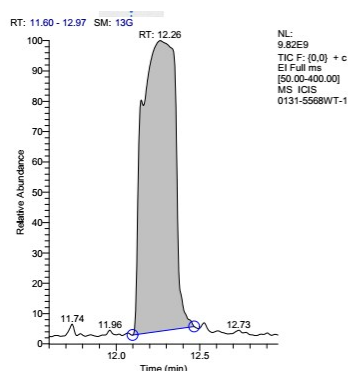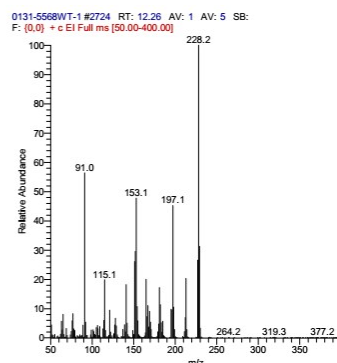

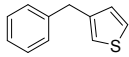

3am

Chemical Formula: C<sub>11</sub>H<sub>10</sub>S  
 Exact Mass: 174.1

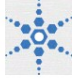

## ChemLab Technologies - GC/MS Report

|                            |                             |                             |                      |
|----------------------------|-----------------------------|-----------------------------|----------------------|
| Data File:                 | 0131-5568WT-2               | Original Data Path:         | E:\GCMS Data\ChemLab |
| Current Data Path:         | E:\GCMS Data\ChemLab        | Sample Type:                | Unknown              |
| Sample ID:                 | 7                           | Sample Name:                |                      |
| Operator:                  | W. T                        | Acquisition Date:           | 02/03/19 01:59:07 AM |
| Run Time(min):             | 15.58                       | Comments:                   |                      |
| Vial:                      | 5                           | Injection Volume(μl):       | 10.00                |
| Scans:                     | 4582                        | Low Mass(m/z):              | 50                   |
| High Mass(m/z):            | 400                         | Sample Volume(μl):          | 0.00                 |
| Sample Weight:             | 0.00                        | ISTD Amount:                | 0.000                |
| Calibration Level:         |                             | Dilution Factor:            | 1.00                 |
| Instrument Method:         | E:\GCMS Methods\ChemLab\CLT | Original Processing Method: |                      |
| Current Processing Method: | N/A                         | Calibration File:           | N/A                  |

Method type: Acquisition - General  
 MS transfer line temperature: 270 °C  
 Ion source temperature: 220 °C  
 Use acquisition threshold: No  
 Ionization mode: EI  
 Run completion: GC run time  
 Segment #1:  
 Start time: 2.5 min  
 Filament/multiplier/dynode on: Yes  
 Chromatography filter on: Yes  
 Chrom. filter peak width time: 1 sec  
 Use tune file emission current: Yes  
 Use last tuned detector gain: Yes  
 Use tune file electron energy: No  
 Electron energy: 70 eV  
 Calibration gas: Off  
 Scan #1  
 Tune file: (Last Saved)  
 Ion polarity: Positive  
 Data type: Centroid  
 Start mass: 50 amu  
 End mass: 400 amu  
 Scan time: 0.2 sec

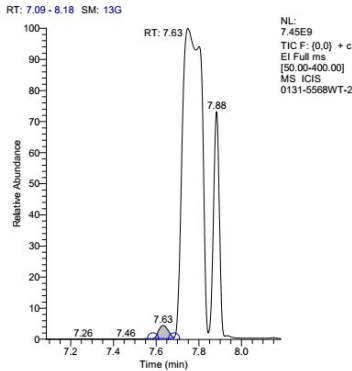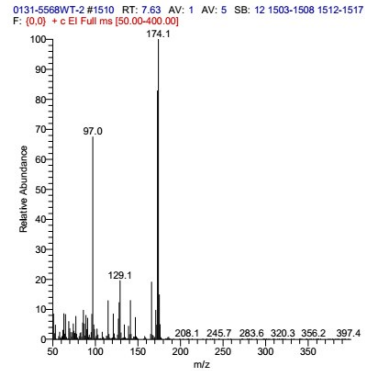

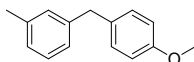

3bb

Chemical Formula: C<sub>15</sub>H<sub>16</sub>O  
Exact Mass: 212.1

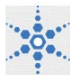

## ChemLab Technologies - GC/MS Report

|                            |                             |                             |                      |
|----------------------------|-----------------------------|-----------------------------|----------------------|
| Data File:                 | 0131-5568WT-3               | Original Data Path:         | E:\GCMS Data\ChemLab |
| Current Data Path:         | E:\GCMS Data\ChemLab        | Sample Type:                | Unknown              |
| Sample ID:                 | 7                           | Sample Name:                |                      |
| Operator:                  | W. T                        | Acquisition Date:           | 02/03/19 02:20:13 AM |
| Run Time(min):             | 15.60                       | Comments:                   |                      |
| Vial:                      | 5                           | Injection Volume(μl):       | 10.00                |
| Scans:                     | 4588                        | Low Mass(m/z):              | 50                   |
| High Mass(m/z):            | 400                         | Sample Volume(μl):          | 0.00                 |
| Sample Weight:             | 0.00                        | ISTD Amount:                | 0.000                |
| Calibration Level:         |                             | Dilution Factor:            | 1.00                 |
| Instrument Method:         | E:\GCMS Methods\ChemLab\CLT | Original Processing Method: |                      |
| Current Processing Method: | N/A                         | Calibration File:           | N/A                  |

|                                 |                       |
|---------------------------------|-----------------------|
| Method type:                    | Acquisition - General |
| MS transfer line temperature:   | 270 °C                |
| Ion source temperature:         | 220 °C                |
| Use acquisition threshold:      | No                    |
| Ionization mode:                | EI                    |
| Run completion:                 | GC run time           |
| Segment #1:                     |                       |
| Start time:                     | 2.5 min               |
| Filament/multiplier/dynode on:  | Yes                   |
| Chromatography filter on:       | Yes                   |
| Chrom. filter peak width time:  | 1 sec                 |
| Use tune file emission current: | Yes                   |
| Use last tuned detector gain:   | Yes                   |
| Use tune file electron energy:  | No                    |
| Electron energy:                | 70 eV                 |
| Calibration gas:                | Off                   |
| Scan #1:                        |                       |
| Tune file:                      | (Last Saved)          |
| Ion polarity:                   | Positive              |
| Data type:                      | Centroid              |
| Start mass:                     | 50 amu                |
| End mass:                       | 400 amu               |
| Scan time:                      | 0.2 sec               |

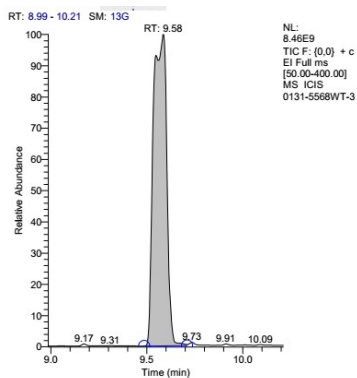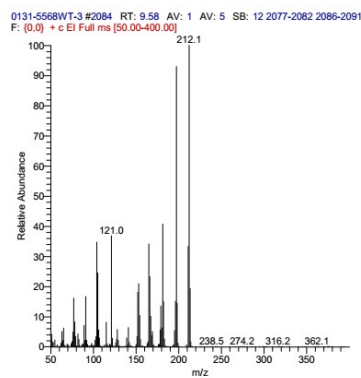

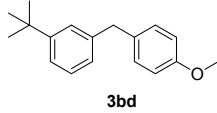

Chemical Formula: C<sub>18</sub>H<sub>22</sub>O  
Exact Mass: 254.2

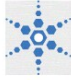

## ChemLab Technologies - GC/MS Report

|                            |                             |                             |                      |
|----------------------------|-----------------------------|-----------------------------|----------------------|
| Data File:                 | 0131-5568WT-4               | Original Data Path:         | E:\GCMS Data\ChemLab |
| Current Data Path:         | E:\GCMS Data\ChemLab        | Sample Type:                | Unknown              |
| Sample ID:                 | 7                           | Sample Name:                |                      |
| Operator:                  | W. T                        | Acquisition Date:           | 02/03/19 02:41:34 AM |
| Run Time(min):             | 15.59                       | Comments:                   |                      |
| Vial:                      | 5                           | Injection Volume(μl):       | 10.00                |
| Scans:                     | 4584                        | Low Mass(m/z):              | 50                   |
| High Mass(m/z):            | 400                         | Sample Volume(μl):          | 0.00                 |
| Sample Weight:             | 0.00                        | ISTD Amount:                | 0.000                |
| Calibration Level:         |                             | Dilution Factor:            | 1.00                 |
| Instrument Method:         | E:\GCMS Methods\ChemLab\CLT | Original Processing Method: |                      |
| Current Processing Method: | N/A                         | Calibration File:           | N/A                  |

Method type: Acquisition - General  
MS transfer line temperature: 270 °C  
Ion source temperature: 220 °C  
Use acquisition threshold: No  
Ionization mode: EI  
Run completion: GC run time  
Segment #1:  
Start time: 2.5 min  
Filament/multiplier/dynode on: Yes  
Chromatography filter on: Yes  
Chrom. filter peak width time: 1 sec  
Use tune file emission current: Yes  
Use last tuned detector gain: Yes  
Use tune file electron energy: No  
Electron energy: 70 eV  
Calibration gas: Off  
Scan #1  
Tune file: (Last Saved)  
Ion polarity: Positive  
Data type: Centroid  
Start mass: 50 amu  
End mass: 400 amu  
Scan time: 0.2 sec

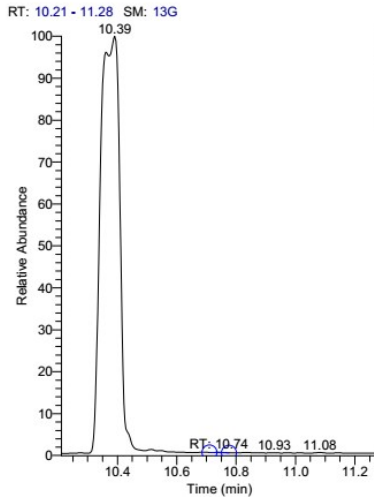

NL:  
7.54E9  
TIC F: {0.0} + c  
EI Full ms  
[50.00-400.00]  
MS ICIS  
0131-5568WT-4

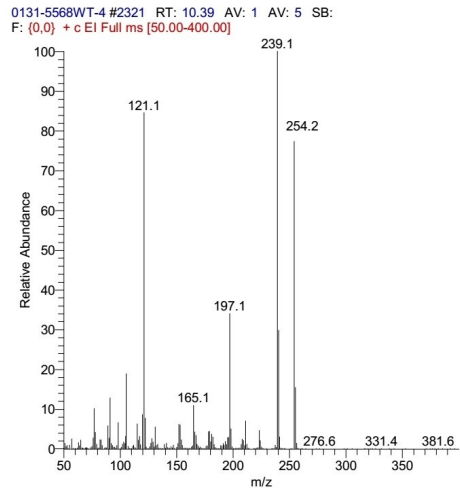

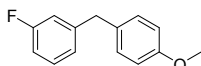

**3be**

Chemical Formula: C<sub>14</sub>H<sub>13</sub>FO  
Exact Mass: 216.1

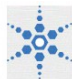

## ChemLab Technologies - GC/MS Report

|                            |                             |                             |                      |
|----------------------------|-----------------------------|-----------------------------|----------------------|
| Data File:                 | 0131-5568WT-5               | Original Data Path:         | E:\GCMS Data\ChemLab |
| Current Data Path:         | E:\GCMS Data\ChemLab        | Sample Type:                | Unknown              |
| Sample ID:                 | 7                           | Sample Name:                |                      |
| Operator:                  | W. T                        | Acquisition Date:           | 02/03/19 03:03:00 AM |
| Run Time(min):             | 15.60                       | Comments:                   |                      |
| Vial:                      | 5                           | Injection Volume(μl):       | 10.00                |
| Scans:                     | 4589                        | Low Mass(m/z):              | 50                   |
| High Mass(m/z):            | 400                         | Sample Volume(μl):          | 0.00                 |
| Sample Weight:             | 0.00                        | ISTD Amount:                | 0.000                |
| Calibration Level:         |                             | Dilution Factor:            | 1.00                 |
| Instrument Method:         | E:\GCMS Methods\ChemLab\CLT | Original Processing Method: |                      |
| Current Processing Method: | N/A                         | Calibration File:           | N/A                  |

Method type: Acquisition - General  
 MS transfer line temperature: 270 °C  
 Ion source temperature: 220 °C  
 Use acquisition threshold: No  
 Ionization mode: EI  
 Run completion: GC run time  
 Segment #1:  
 Start time: 2.5 min  
 Filament/multiplier/dynode on: Yes  
 Chromatography filter on: Yes  
 Chrom. filter peak width time: 1 sec  
 Use tune file emission current: Yes  
 Use last tuned detector gain: Yes  
 Use tune file electron energy: No  
 Electron energy: 70 eV  
 Calibration gas: Off  
 Scan #1  
 Tune file: (Last Saved)  
 Ion polarity: Positive  
 Data type: Centroid  
 Start mass: 50 amu  
 End mass: 400 amu  
 Scan time: 0.2 sec

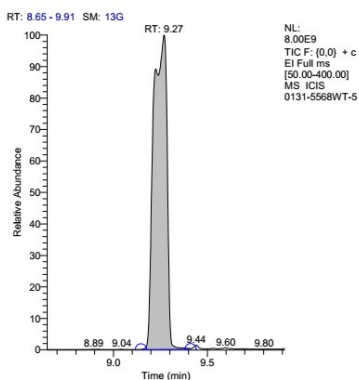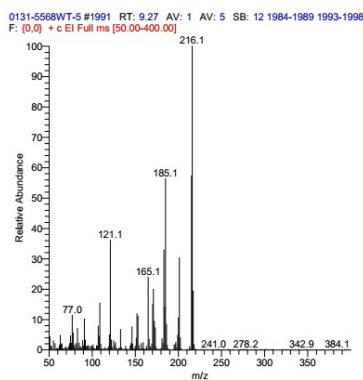



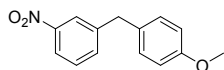

3bf

Chemical Formula: C<sub>14</sub>H<sub>13</sub>NO<sub>3</sub>  
Exact Mass: 243.1

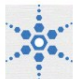

## ChemLab Technologies - GC/MS Report

|                            |                             |                             |                      |
|----------------------------|-----------------------------|-----------------------------|----------------------|
| Data File:                 | 0131-5568WT-6               | Original Data Path:         | E:\GCMS Data\ChemLab |
| Current Data Path:         | E:\GCMS Data\ChemLab        | Sample Type:                | Unknown              |
| Sample ID:                 | 7                           | Sample Name:                |                      |
| Operator:                  | W. T                        | Acquisition Date:           | 02/03/19 03:24:26 AM |
| Run Time(min):             | 15.60                       | Comments:                   |                      |
| Vial:                      | 5                           | Injection Volume(μl):       | 10.00                |
| Scans:                     | 4589                        | Low Mass(m/z):              | 50                   |
| High Mass(m/z):            | 400                         | Sample Volume(μl):          | 0.00                 |
| Sample Weight:             | 0.00                        | ISTD Amount:                | 0.000                |
| Calibration Level:         |                             | Dilution Factor:            | 1.00                 |
| Instrument Method:         | E:\GCMS Methods\ChemLab\CLT | Original Processing Method: |                      |
| Current Processing Method: | N/A                         | Calibration File:           | N/A                  |

|                                 |                       |
|---------------------------------|-----------------------|
| Method type:                    | Acquisition - General |
| MS transfer line temperature:   | 270 °C                |
| Ion source temperature:         | 220 °C                |
| Use acquisition threshold:      | No                    |
| Ionization mode:                | EI                    |
| Run completion:                 | GC run time           |
| Segment #1:                     |                       |
| Start time:                     | 2.5 min               |
| Filament/multiplier/dynode on:  | Yes                   |
| Chromatography filter on:       | Yes                   |
| Chrom. filter peak width time:  | 1 sec                 |
| Use tune file emission current: | Yes                   |
| Use last tuned detector gain:   | Yes                   |
| Use tune file electron energy:  | No                    |
| Electron energy:                | 70 eV                 |
| Calibration gas:                | Off                   |
| Scan #1                         |                       |
| Tune file:                      | (Last Saved)          |
| Ion polarity:                   | Positive              |
| Data type:                      | Centroid              |
| Start mass:                     | 50 amu                |
| End mass:                       | 400 amu               |
| Scan time:                      | 0.2 sec               |

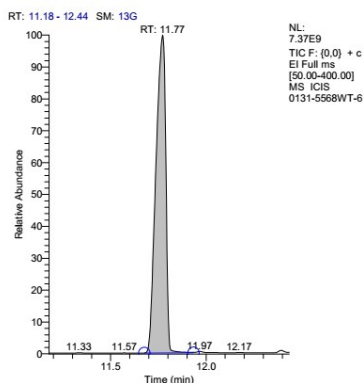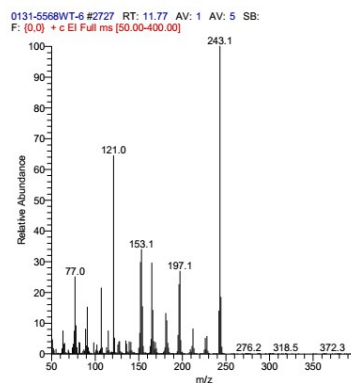

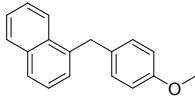

3bg

Chemical Formula: C<sub>18</sub>H<sub>16</sub>O  
Exact Mass: 248.1

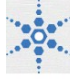

## ChemLab Technologies - GC/MS Report

|                            |                             |                             |                      |
|----------------------------|-----------------------------|-----------------------------|----------------------|
| Data File:                 | 0131-5568WT-7               | Original Data Path:         | E:\GCMS Data\ChemLab |
| Current Data Path:         | E:\GCMS Data\ChemLab        | Sample Type:                | Unknown              |
| Sample ID:                 | 7                           | Sample Name:                |                      |
| Operator:                  | W. T                        | Acquisition Date:           | 02/03/19 03:45:52 AM |
| Run Time(min):             | 10.25                       | Comments:                   |                      |
| Vial:                      | 5                           | Injection Volume(μl):       | 10.00                |
| Scans:                     | 3016                        | Low Mass(m/z):              | 50                   |
| High Mass(m/z):            | 400                         | Sample Volume(μl):          | 0.00                 |
| Sample Weight:             | 0.00                        | ISTD Amount:                | 0.000                |
| Calibration Level:         |                             | Dilution Factor:            | 1.00                 |
| Instrument Method:         | E:\GCMS Methods\ChemLab\CLT | Original Processing Method: |                      |
| Current Processing Method: | N/A                         | Calibration File:           | N/A                  |

```

Method type: Acquisition - General
MS transfer line temperature: 270 °C
Ion source temperature: 220 °C
Use acquisition threshold: No
Ionization mode: EI
Run completion: GC run time
Segment #1:
Start time: 2.5 min
Filament/multiplier/dynode on: Yes
Chromatography filter on: Yes
Chrom. filter peak width time: 1 sec
Use tune file emission current: Yes
Use last tuned detector gain: Yes
Use tune file electron energy: No
Electron energy: 70 eV
Calibration gas: Off
Scan #1
Tune file: (Last Saved)
Ion polarity: Positive
Data type: Centroid
Start mass: 50 amu
End mass: 400 amu
Scan time: 0.2 sec
  
```

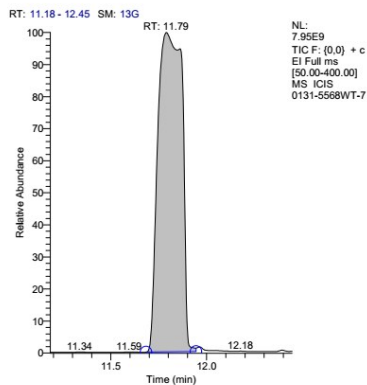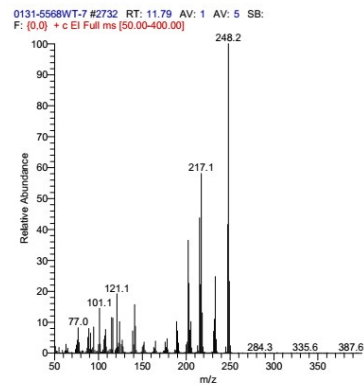

Supplement: c8ra10439e1.pdf [file c8ra10439e1.pdf]
